# Supplementary material for: Comparative analyses of persistence traits in Escherichia coli O157:H7 strains belonging to different clades including REPEXH01 and REPEXH02 strains
Source: Front Microbiol. 2024 Dec 18;15:1501956. doi: 10.3389/fmicb.2024.1501956 (PMC11688487; doi:10.3389/fmicb.2024.1501956)
Supplement: Supplementary file 1 [file Table_1.xlsx]

## Sheet: Table 1
Table 1. Prophages and prophage-like elements in EcO157 strains
STRAIN	GENOMIC_LOCATION	REGION	REGION_LENGTH	COMPLETENESS(score)	SPECIFIC_KEYWORD	REGION_POSITION	TRNA_NUM	TOTAL_PROTEIN_NUM	PHAGE_HIT_PROTEIN_NUM	HYPOTHETICAL_PROTEIN_NUM	PHAGE+HYPO_PROTEIN_PERCENTAGE	BACTERIAL_PROTEIN_NUM	ATT_SITE_SHOWUP	PHAGE_SPECIES_NUM	MOST_COMMON_PHAGE_NAME(hit_genes_count)	FIRST_MOST_COMMON_PHAGE_NUM	FIRST_MOST_COMMON_PHAGE_PERCENTAGE	GC_PERCENTAGE
PNUSAE013245	Chromosome	1	13.1Kb	questionable(90)	transposase,tail	840558-853730	0	14	9	5	1	0	no	5	PHAGE_Stx2_c_1717_NC_011357(3),PHAGE_Escher_SH2026Stx1_NC_049919(2),PHAGE_Stx2_c_Stx2a_F451_NC_049924(2),PHAGE_Stx2_II_NC_004914(2),PHAGE_Entero_VT2phi_272_NC_028656(2),PHAGE_Escher_PA28_NC_041935(1),PHAGE_Achrom_Motura_NC_049849(1),PHAGE_Aeromo_LAh_6_NC_048774(1),PHAGE_Aeromo_LAh9_NC_048776(1),PHAGE_Entero_BP_4795_NC_004813(1),PHAGE_Stx2_c_Stx2a_WGPS9_NC_049923(1),PHAGE_Ralsto_RSL1_NC_010811(1),…	5	0.2142	49.2
		2	36.1Kb	questionable(80)	transposase,tail,integrase	844501-880619	0	20	11	9	1	0	yes	8	PHAGE_Stx2_c_Stx2a_F451_NC_049924(4),PHAGE_Stx2_c_1717_NC_011357(3),PHAGE_Escher_SH2026Stx1_NC_049919(3),PHAGE_Klebsi_vB_KpnP_KpV475_NC_031025(1),PHAGE_Klebsi_vB_KpnP_KpV71_NC_031246(1),PHAGE_Pseudo_MP1412_NC_018282(1),PHAGE_Pseudo_pf16_NC_041881(1),PHAGE_Marino_P12026_NC_018269(1),PHAGE_Entero_BP_4795_NC_004813(1),PHAGE_Escher_ArgO145_NC_049918(1),PHAGE_Stx2_c_Stx2a_WGPS9_NC_049923(1),PHAGE_Ente…	4	0.2	46.5
		3	38Kb	questionable(90)	transposase,integrase	916169-954215	0	31	12	19	1	0	yes	10	PHAGE_Stx2_c_Stx2a_F451_NC_049924(3),PHAGE_Escher_SH2026Stx1_NC_049919(3),PHAGE_Stx2_c_1717_NC_011357(3),PHAGE_Entero_P1_NC_005856(2),PHAGE_Entero_HK633_NC_019719(1),PHAGE_Shigel_SfIV_NC_022749(1),PHAGE_Rhodob_RC1_NC_020839(1),PHAGE_Bordet_vB_BbrM_PHB04_NC_047861(1),PHAGE_Erwini_phiEt88_NC_015295(1),PHAGE_Entero_BP_4795_NC_004813(1),PHAGE_Escher_vB_EcoM_Goslar_NC_048170(1),PHAGE_Escher_RCS47_NC_0…	3	0.0967	49.8
		4	20.9Kb	questionable(70)	integrase,transposase,lysin,tail	1300199-1321197	0	25	17	8	1	0	yes	10	PHAGE_Entero_YYZ_2008_NC_011356(7),PHAGE_Stx2_c_1717_NC_011357(7),PHAGE_Entero_BP_4795_NC_004813(5),PHAGE_Escher_SH2026Stx1_NC_049919(4),PHAGE_Stx2_II_NC_004914(3),PHAGE_Entero_VT2phi_272_NC_028656(3),PHAGE_Escher_Lys12581Vzw_NC_049917(2),PHAGE_Stx2_c_Stx2a_WGPS9_NC_049923(2),PHAGE_Stx2_c_86_NC_008464(2),PHAGE_Stx2_c_Stx2a_F451_NC_049924(2),PHAGE_Entero_HK544_NC_019767(2),PHAGE_Entero_HK446_NC_01…	6	0.28	41.9
		5	13.9Kb	incomplete(60)	tail	1322357-1336332	1	19	13	6	1	0	no	3	PHAGE_Escher_500465_1_NC_049342(12),PHAGE_Phage_Gifsy_2_NC_010393(1),PHAGE_Bacill_SP_15_NC_031245(1),PHAGE_Entero_cdtI_NC_009514(1),PHAGE_Bacill_G_NC_023719(1),PHAGE_Pseudo_YuA_NC_010116(1),PHAGE_Entero_YYZ_2008_NC_011356(1),PHAGE_Staphy_StauST398_5_NC_023500(1),PHAGE_Klebsi_ST15_OXA48phi14.1_NC_049454(1),PHAGE_Klebsi_ST16_OXA48phi5.4_NC_049450(1),PHAGE_Klebsi_ST437_OXA245phi4.1_NC_049448(1),PHAG…	11	0.6315	50
		6	73.9Kb	intact(150)	injection,integrase,lysin,tail,capsid,portal,terminase	1601511-1675440	0	84	81	3	1	0	yes	15	PHAGE_Escher_PA28_NC_041935(51),PHAGE_Stx2_c_Stx2a_F451_NC_049924(38),PHAGE_Escher_ArgO145_NC_049918(29),PHAGE_Entero_933W_NC_000924(29),PHAGE_Stx2_c_Stx2a_WGPS9_NC_049923(28),PHAGE_Entero_VT2phi_272_NC_028656(17),PHAGE_Stx2_vB_EcoP_24B_NC_027984(16),PHAGE_Stx2_c_86_NC_008464(15),PHAGE_Escher_SH2026Stx1_NC_049919(15),PHAGE_Escher_Lys12581Vzw_NC_049917(13),PHAGE_Escher_PA2_NC_028449(12),PHAGE_Stx2…	25	0.6071	48.7
		7	52.7Kb	intact(150)	integrase,tail,transposase,lysin,terminase,portal,head	1912022-1964792	0	74	65	9	1	0	yes	29	PHAGE_Entero_BP_4795_NC_004813(19),PHAGE_Entero_YYZ_2008_NC_011356(18),PHAGE_Entero_cdtI_NC_009514(13),PHAGE_Stx2_c_Stx2a_F451_NC_049924(13),PHAGE_Entero_933W_NC_000924(12),PHAGE_Stx2_c_1717_NC_011357(12),PHAGE_Escher_PA28_NC_041935(11),PHAGE_Entero_mEp460_NC_019716(10),PHAGE_Entero_DE3_NC_042057(9),PHAGE_Entero_c_1_NC_019706(8),PHAGE_Entero_mEp213_NC_019720(8),PHAGE_Stx2_vB_EcoP_24B_NC_027984(8)…	18	0.2567	50.9
		8	25Kb	intact(150)	capsid,terminase,head,tail,lysin,plate	2024677-2049698	0	35	33	2	1	0	no	6	PHAGE_Escher_pro483_NC_028943(28),PHAGE_Escher_P2_NC_041848(18),PHAGE_Entero_WPhi_NC_005056(18),PHAGE_Yersin_L_413C_NC_004745(17),PHAGE_Entero_fiAA91_ss_NC_022750(15),PHAGE_Escher_pro147_NC_028896(14),PHAGE_Entero_P2_NC_001895(14),PHAGE_Escher_vB_EcoM_12474III_NC_049457(13),PHAGE_Escher_500465_1_NC_049342(4),PHAGE_Escher_500465_2_NC_049343(3),PHAGE_Entero_HK106_NC_019768(2),PHAGE_Entero_HK97_NC_0…	28	0.8	54.9
		9	58.6Kb	intact(150)	integrase,transposase,tail,lysis,terminase,head,portal	2134095-2192724	0	80	76	4	1	0	yes	12	PHAGE_Stx2_c_1717_NC_011357(57),PHAGE_Entero_YYZ_2008_NC_011356(41),PHAGE_Entero_BP_4795_NC_004813(27),PHAGE_Stx2_II_NC_004914(16),PHAGE_Stx2_c_Stx2a_F451_NC_049924(12),PHAGE_Entero_VT2_Sakai_NC_000902(11),PHAGE_Escher_PA28_NC_041935(10),PHAGE_Escher_phage_NC_004913(10),PHAGE_Escher_SH2026Stx1_NC_049919(9),PHAGE_Entero_cdtI_NC_009514(9),PHAGE_Stx2_c_Stx2a_WGPS9_NC_049923(9),PHAGE_Entero_mEp234_NC…	58	0.7125	50.8
		10	44Kb	intact(130)	tail,transposase,head,capsid,portal	2234544-2278589	0	60	48	12	1	0	yes	24	PHAGE_Entero_BP_4795_NC_004813(14),PHAGE_Entero_YYZ_2008_NC_011356(13),PHAGE_Entero_DE3_NC_042057(12),PHAGE_Entero_HK629_NC_019711(11),PHAGE_Entero_HK630_NC_019723(9),PHAGE_Entero_lambda_NC_001416(9),PHAGE_Stx2_c_1717_NC_011357(8),PHAGE_Phage_Gifsy_1_NC_010392(7),PHAGE_Entero_phi80_NC_021190(6),PHAGE_Entero_mEp237_NC_019704(6),PHAGE_Entero_N15_NC_001901(6),PHAGE_Entero_mEp460_NC_019716(6),PHAGE_E…	13	0.2333	51.9
		11	27Kb	intact(140)	transposase,tail,recombinase,integrase	2327459-2354524	0	35	31	4	1	0	yes	9	PHAGE_Entero_P88_NC_026014(19),PHAGE_Escher_520873_NC_049344(17),PHAGE_Escher_503458_NC_049341(10),PHAGE_Escher_500465_2_NC_049343(8),PHAGE_Entero_phiT5282H_NC_049429(6),PHAGE_Escher_PA28_NC_041935(3),PHAGE_Klebsi_3LV2017_NC_047817(3),PHAGE_Haemop_HP2_NC_003315(2),PHAGE_Salmon_RE_2010_NC_019488(2),PHAGE_Entero_mEp213_NC_019720(1),PHAGE_Serrat_Eta_NC_021563(1),PHAGE_Strept_9874_NC_031023(1),PHAGE_…	20	0.5428	49.9
		12	34.5Kb	incomplete(60)	integrase,tail,transposase	2675866-2710459	0	13	9	4	1	0	yes	7	PHAGE_Phage_Gifsy_2_NC_010393(3),PHAGE_Entero_BP_4795_NC_004813(3),PHAGE_Salmon_118970_sal3_NC_031940(2),PHAGE_Entero_YYZ_2008_NC_011356(2),PHAGE_Stx2_II_NC_004914(2),PHAGE_Escher_phi191_NC_028660(2),PHAGE_Entero_VT2phi_272_NC_028656(2),PHAGE_Bacill_SPbeta_NC_001884(1),PHAGE_Escher_PA28_NC_041935(1),PHAGE_Escher_RCS47_NC_042128(1),PHAGE_Phage_Gifsy_1_NC_010392(1),PHAGE_Escher_TL_2011c_NC_019442(1…	3	0.2307	50.3
		13	85.4Kb	intact(150)	lysis,lysin,terminase,head,portal,tail,transposase,integrase	2699491-2784916	0	116	101	15	1	0	yes	29	PHAGE_Entero_YYZ_2008_NC_011356(32),PHAGE_Entero_BP_4795_NC_004813(31),PHAGE_Stx2_c_1717_NC_011357(23),PHAGE_Stx2_c_Stx2a_F451_NC_049924(8),PHAGE_Entero_cdtI_NC_009514(8),PHAGE_Entero_mEp460_NC_019716(7),PHAGE_Shigel_POCJ13_NC_025434(6),PHAGE_Escher_Lys12581Vzw_NC_049917(6),PHAGE_Entero_VT2_Sakai_NC_000902(5),PHAGE_Shigel_Stx_NC_029120(5),PHAGE_Entero_933W_NC_000924(5),PHAGE_Entero_mEp237_NC_0197…	56	0.2758	52.7
		14	58.2Kb	intact(150)	transposase,tail,integrase,portal,lysin	3070235-3128507	0	59	50	9	1	0	yes	17	PHAGE_Entero_DE3_NC_042057(17),PHAGE_Entero_lambda_NC_001416(17),PHAGE_Entero_HK629_NC_019711(16),PHAGE_Entero_HK630_NC_019723(16),PHAGE_Entero_BP_4795_NC_004813(15),PHAGE_Entero_YYZ_2008_NC_011356(14),PHAGE_Stx2_c_1717_NC_011357(11),PHAGE_Stx2_c_Stx2a_F451_NC_049924(7),PHAGE_Escher_Lys12581Vzw_NC_049917(6),PHAGE_Entero_cdtI_NC_009514(6),PHAGE_Entero_mEp460_NC_019716(6),PHAGE_Escher_SH2026Stx1_NC…	17	0.2881	49.8
		15	20.6Kb	incomplete(30)	tail,integrase	3107785-3128463	0	14	8	6	1	0	yes	7	PHAGE_Salmon_118970_sal3_NC_031940(2),PHAGE_Escher_phiV10_NC_007804(2),PHAGE_Entero_UAB_Phi20_NC_031019(2),PHAGE_Pectob_ZF40_NC_019522(2),PHAGE_Entero_ES18_NC_006949(2),PHAGE_Cronob_phiES15_NC_018454(1),PHAGE_Escher_P13374_NC_018846(1),PHAGE_Entero_mEp235_NC_019708(1),PHAGE_Salmon_ST64B_NC_004313(1),PHAGE_Pseudo_phi2_NC_030931(1),PHAGE_Entero_mEp390_NC_019721(1),PHAGE_Entero_HK225_NC_019717(1),PH…	2	0.1428	48.9
		16	49Kb	intact(110)	tail,lysin,integrase	3204903-3253967	0	50	45	5	1	0	yes	20	PHAGE_Entero_lambda_NC_001416(27),PHAGE_Entero_HK629_NC_019711(25),PHAGE_Entero_HK630_NC_019723(24),PHAGE_Entero_DE3_NC_042057(24),PHAGE_Entero_mEp237_NC_019704(7),PHAGE_Entero_BP_4795_NC_004813(7),PHAGE_Entero_HK225_NC_019717(7),PHAGE_Entero_phi80_NC_021190(5),PHAGE_Entero_mEp460_NC_019716(4),PHAGE_Entero_cdtI_NC_009514(4),PHAGE_Entero_YYZ_2008_NC_011356(3),PHAGE_Entero_933W_NC_000924(3),PHAGE_C…	24	0.54	50.2
		17	51.2Kb	intact(150)	tail,head,portal,terminase,lysin,integrase	3283230-3334508	0	61	49	12	1	0	yes	22	PHAGE_Entero_BP_4795_NC_004813(24),PHAGE_Entero_YYZ_2008_NC_011356(22),PHAGE_Stx2_c_1717_NC_011357(18),PHAGE_Entero_mEp460_NC_019716(6),PHAGE_Escher_Lys12581Vzw_NC_049917(6),PHAGE_Entero_VT2_Sakai_NC_000902(5),PHAGE_Shigel_POCJ13_NC_025434(4),PHAGE_Stx2_c_Stx2a_F451_NC_049924(4),PHAGE_Salmon_118970_sal3_NC_031940(3),PHAGE_Shigel_Stx_NC_029120(3),PHAGE_Escher_ECP1_NC_049926(3),PHAGE_Shigel_Ss_VASD…	22	0.3934	51.5
		18	10.7Kb	questionable(70)	transposase	3451504-3462235	0	14	9	5	1	0	no	3	PHAGE_Stx2_c_1717_NC_011357(3),PHAGE_Escher_SH2026Stx1_NC_049919(3),PHAGE_Stx2_c_Stx2a_F451_NC_049924(3),PHAGE_Acinet_vB_AbaM_ME3_NC_041884(2),PHAGE_Entero_BP_4795_NC_004813(1),PHAGE_Clostr_phiCD38_2_NC_015568(1),PHAGE_Clostr_phiCD111_NC_028905(1),PHAGE_Clostr_phiCD146_NC_028958(1)	6	0.2142	53.4
		19	21.4Kb	questionable(80)	transposase,integrase	3471794-3493292	0	15	8	7	1	0	yes	4	PHAGE_Stx2_c_1717_NC_011357(4),PHAGE_Stx2_c_Stx2a_F451_NC_049924(3),PHAGE_Escher_PA28_NC_041935(3),PHAGE_Escher_SH2026Stx1_NC_049919(3),PHAGE_Stx2_II_NC_004914(2),PHAGE_Entero_BP_4795_NC_004813(2),PHAGE_Pseudo_MD8_NC_031091(1),PHAGE_Vibrio_SIO_2_NC_016567(1),PHAGE_Escher_RCS47_NC_042128(1),PHAGE_Klebsi_Sugarland_NC_042093(1),PHAGE_Entero_P1_NC_005856(1),PHAGE_Shigel_SfIV_NC_022749(1),PHAGE_Stenot…	4	0.2666	44.2
		20	29.2Kb	intact(140)	tail,capsid,head,transposase	3592177-3621383	0	37	31	6	1	0	no	14	PHAGE_Entero_BP_4795_NC_004813(12),PHAGE_Entero_DE3_NC_042057(12),PHAGE_Stx2_c_1717_NC_011357(11),PHAGE_Entero_YYZ_2008_NC_011356(10),PHAGE_Entero_HK629_NC_019711(9),PHAGE_Entero_lambda_NC_001416(9),PHAGE_Entero_HK630_NC_019723(9),PHAGE_Phage_Gifsy_1_NC_010392(6),PHAGE_Entero_cdtI_NC_009514(5),PHAGE_Entero_N15_NC_001901(5),PHAGE_Stx2_c_Stx2a_F451_NC_049924(5),PHAGE_Escher_SH2026Stx1_NC_049919(5),…	13	0.3243	54.7
		21	38Kb	incomplete(30)	tail	3617480-3655567	0	31	16	15	1	0	yes	10	PHAGE_Shigel_POCJ13_NC_025434(6),PHAGE_Shigel_Stx_NC_029120(6),PHAGE_Salmon_118970_sal3_NC_031940(5),PHAGE_Entero_SfV_NC_003444(2),PHAGE_Phage_Gifsy_1_NC_010392(2),PHAGE_Escher_Lys12581Vzw_NC_049917(2),PHAGE_Entero_mEp237_NC_019704(2),PHAGE_Salmon_SPN3UB_NC_019545(2),PHAGE_Salmon_ST64B_NC_004313(2),PHAGE_Phage_Gifsy_2_NC_010393(2),PHAGE_Entero_phiP27_NC_003356(2),PHAGE_Entero_mEp460_NC_019716(2),…	6	0.1935	48.5
		22	48.5Kb	intact(150)	tail,protease,portal,terminase,lysin,transposase,integrase	3863144-3911644	0	48	40	8	1	0	yes	14	PHAGE_Entero_cdtI_NC_009514(22),PHAGE_Entero_mEp460_NC_019716(21),PHAGE_Salmon_Fels_1_NC_010391(10),PHAGE_Phage_Gifsy_1_NC_010392(9),PHAGE_Phage_Gifsy_2_NC_010393(8),PHAGE_Entero_c_1_NC_019706(8),PHAGE_Entero_mEp213_NC_019720(8),PHAGE_Entero_BP_4795_NC_004813(8),PHAGE_Stx2_c_1717_NC_011357(6),PHAGE_Entero_lambda_NC_001416(5),PHAGE_Entero_SfI_NC_027339(4),PHAGE_Entero_DE3_NC_042057(4),PHAGE_Stx2_c…	23	0.4583	50.2
		23	29.1Kb	intact(130)	integrase,transposase,tail,plate	4484845-4513979	0	19	19	0	1	0	yes	12	PHAGE_Escher_pro483_NC_028943(5),PHAGE_Entero_SfI_NC_027339(5),PHAGE_Entero_lambda_NC_001416(4),PHAGE_Salmon_SEN34_NC_028699(3),PHAGE_Entero_HK97_NC_002167(3),PHAGE_Escher_PA28_NC_041935(3),PHAGE_Escher_500465_2_NC_049343(3),PHAGE_Escher_P2_NC_041848(3),PHAGE_Entero_BP_4795_NC_004813(3),PHAGE_Escher_500465_1_NC_049342(2),PHAGE_Shigel_SfII_NC_021857(2),PHAGE_Entero_HK542_NC_019769(2),PHAGE_Stx2_II…	5	0.2631	46.3
		24	29Kb	questionable(70)	integrase,tail,capsid	5182619-5211710	0	22	18	4	1	0	yes	9	PHAGE_Entero_mEp460_NC_019716(9),PHAGE_Entero_cdtI_NC_009514(6),PHAGE_Entero_YYZ_2008_NC_011356(6),PHAGE_Entero_BP_4795_NC_004813(4),PHAGE_Stx2_c_1717_NC_011357(4),PHAGE_Salmon_118970_sal3_NC_031940(3),PHAGE_Entero_SfV_NC_003444(2),PHAGE_Shigel_SfIV_NC_022749(2),PHAGE_Escher_phi191_NC_028660(1),PHAGE_Pectob_ZF40_NC_019522(1),PHAGE_Stx2_c_Stx2a_WGPS9_NC_049923(1),PHAGE_Entero_DE3_NC_042057(1),PHAG…	9	0.409	47.5
	pO157	1	23.1Kb	incomplete(60)	transposase,integrase,tail	39158-62340	0	17	10	7	1	0	yes	8	PHAGE_Entero_N15_NC_001901(3),PHAGE_Escher_PA28_NC_041935(2),PHAGE_Klebsi_phiKO2_NC_005857(2),PHAGE_Entero_VT2phi_272_NC_028656(2),PHAGE_Stx2_II_NC_004914(2),PHAGE_Yersin_PY54_NC_005069(2),PHAGE_Stx2_c_Stx2a_WGPS9_NC_049923(2),PHAGE_Escher_RCS47_NC_042128(2),PHAGE_Entero_BP_4795_NC_004813(2),PHAGE_Strept_phiARI0004_NC_031920(1),PHAGE_Brevib_Jenst_NC_028805(1),PHAGE_Staphy_vB_SepS_SEP9_NC_023582(1…	3	0.1764	47
EC4115	Chromosome	1	24.7Kb	intact(110)	integrase,tail,transposase,plate	302613-327404	0	18	17	1	1	0	yes	13	PHAGE_Entero_SfI_NC_027339(5),PHAGE_Entero_lambda_NC_001416(4),PHAGE_Escher_pro483_NC_028943(4),PHAGE_Escher_P2_NC_041848(3),PHAGE_Escher_500465_2_NC_049343(3),PHAGE_Escher_PA28_NC_041935(3),PHAGE_Salmon_SEN34_NC_028699(3),PHAGE_Entero_BP_4795_NC_004813(3),PHAGE_Entero_c_1_NC_019706(2),PHAGE_Entero_mEp234_NC_019715(2),PHAGE_Entero_HK633_NC_019719(2),PHAGE_Escher_500465_1_NC_049342(2),PHAGE_Entero…	4	0.2777	44
		2	38.5Kb	intact(150)	integrase,lysin,terminase,portal,protease,tail	894469-933059	0	44	38	6	1	0	yes	13	PHAGE_Entero_cdtI_NC_009514(22),PHAGE_Entero_mEp460_NC_019716(21),PHAGE_Salmon_Fels_1_NC_010391(10),PHAGE_Phage_Gifsy_1_NC_010392(9),PHAGE_Entero_c_1_NC_019706(8),PHAGE_Entero_mEp213_NC_019720(8),PHAGE_Phage_Gifsy_2_NC_010393(8),PHAGE_Entero_lambda_NC_001416(6),PHAGE_Entero_BP_4795_NC_004813(6),PHAGE_Entero_HK630_NC_019723(5),PHAGE_Entero_DE3_NC_042057(5),PHAGE_Stx2_c_1717_NC_011357(5),PHAGE_Ente…	23	0.5	49.3
		3	38Kb	incomplete(30)	tail	1149310-1187391	0	31	16	15	1	0	yes	10	PHAGE_Shigel_POCJ13_NC_025434(6),PHAGE_Shigel_Stx_NC_029120(6),PHAGE_Salmon_118970_sal3_NC_031940(5),PHAGE_Salmon_ST64B_NC_004313(2),PHAGE_Salmon_SPN3UB_NC_019545(2),PHAGE_Phage_Gifsy_2_NC_010393(2),PHAGE_Escher_Lys12581Vzw_NC_049917(2),PHAGE_Entero_mEp460_NC_019716(2),PHAGE_Entero_phiP27_NC_003356(2),PHAGE_Entero_mEp237_NC_019704(2),PHAGE_Phage_Gifsy_1_NC_010392(2),PHAGE_Entero_SfV_NC_003444(2),…	6	0.1935	48.5
		4	30.5Kb	intact(150)	transposase,tail,head,capsid	1183499-1214018	0	40	33	7	1	0	no	14	PHAGE_Entero_BP_4795_NC_004813(12),PHAGE_Entero_DE3_NC_042057(12),PHAGE_Stx2_c_1717_NC_011357(11),PHAGE_Entero_YYZ_2008_NC_011356(10),PHAGE_Entero_HK629_NC_019711(9),PHAGE_Entero_HK630_NC_019723(9),PHAGE_Entero_lambda_NC_001416(9),PHAGE_Phage_Gifsy_1_NC_010392(6),PHAGE_Escher_SH2026Stx1_NC_049919(5),PHAGE_Entero_N15_NC_001901(5),PHAGE_Entero_cdtI_NC_009514(5),PHAGE_Stx2_c_Stx2a_F451_NC_049924(5),…	13	0.3	54.7
		5	29.4Kb	questionable(80)	integrase,transposase	1312560-1342042	0	14	8	6	1	0	yes	4	PHAGE_Stx2_c_1717_NC_011357(4),PHAGE_Stx2_c_Stx2a_F451_NC_049924(3),PHAGE_Escher_PA28_NC_041935(3),PHAGE_Escher_SH2026Stx1_NC_049919(3),PHAGE_Entero_BP_4795_NC_004813(2),PHAGE_Stx2_II_NC_004914(2),PHAGE_Stenot_vB_SmaS_DLP_5_NC_042082(1),PHAGE_Pseudo_SM1_NC_041877(1),PHAGE_Entero_P1_NC_005856(1),PHAGE_Shigel_SfIV_NC_022749(1),PHAGE_Stx2_c_Stx2a_WGPS9_NC_049923(1),PHAGE_Pseudo_MD8_NC_031091(1),PHAG…	4	0.2857	45.7
		6	10.7Kb	questionable(80)	transposase,tail	1343961-1354692	0	13	10	3	1	0	no	3	PHAGE_Stx2_c_Stx2a_F451_NC_049924(3),PHAGE_Stx2_c_1717_NC_011357(3),PHAGE_Escher_SH2026Stx1_NC_049919(3),PHAGE_Acinet_vB_AbaM_ME3_NC_041884(3),PHAGE_Clostr_phiCD38_2_NC_015568(1),PHAGE_Clostr_phiCD146_NC_028958(1),PHAGE_Entero_BP_4795_NC_004813(1),PHAGE_Clostr_phiCD111_NC_028905(1)	6	0.2307	53.4
		7	50.5Kb	intact(150)	integrase,tail,lysis,lysin,terminase,head,portal	1482236-1532758	0	63	50	13	1	0	yes	21	PHAGE_Entero_BP_4795_NC_004813(24),PHAGE_Entero_YYZ_2008_NC_011356(23),PHAGE_Stx2_c_1717_NC_011357(18),PHAGE_Escher_Lys12581Vzw_NC_049917(6),PHAGE_Entero_mEp460_NC_019716(6),PHAGE_Entero_VT2_Sakai_NC_000902(5),PHAGE_Shigel_POCJ13_NC_025434(4),PHAGE_Stx2_c_Stx2a_F451_NC_049924(4),PHAGE_Escher_ArgO145_NC_049918(3),PHAGE_Salmon_118970_sal3_NC_031940(3),PHAGE_Shigel_Stx_NC_029120(3),PHAGE_Escher_ECP1…	24	0.3809	49.2
		8	31.6Kb	intact(100)	transposase,integrase,tail,capsid,head	1526974-1558663	0	29	15	14	1	0	yes	12	PHAGE_Phage_Gifsy_1_NC_010392(3),PHAGE_Entero_phi80_NC_021190(2),PHAGE_Entero_DE3_NC_042057(2),PHAGE_Entero_mEp237_NC_019704(2),PHAGE_Entero_HK225_NC_019717(2),PHAGE_Pseudo_MD8_NC_031091(2),PHAGE_Entero_N15_NC_001901(2),PHAGE_Shigel_SfIV_NC_022749(1),PHAGE_Pseudo_F10_NC_007805(1),PHAGE_Staphy_SA780ruMSSAST101_NC_048711(1),PHAGE_Bacill_G_NC_023719(1),PHAGE_Mycoba_Phipps_NC_028942(1),PHAGE_Entero_m…	3	0.1034	48.7
		9	50.9Kb	intact(110)	integrase,lysin,tail	1552227-1603195	0	48	44	4	1	0	yes	19	PHAGE_Entero_lambda_NC_001416(27),PHAGE_Entero_HK629_NC_019711(25),PHAGE_Entero_HK630_NC_019723(24),PHAGE_Entero_DE3_NC_042057(24),PHAGE_Entero_HK225_NC_019717(7),PHAGE_Entero_mEp237_NC_019704(7),PHAGE_Entero_BP_4795_NC_004813(7),PHAGE_Entero_phi80_NC_021190(5),PHAGE_Entero_cdtI_NC_009514(4),PHAGE_Entero_mEp460_NC_019716(4),PHAGE_Entero_N15_NC_001901(3),PHAGE_Entero_YYZ_2008_NC_011356(3),PHAGE_Cr…	24	0.5625	50.3
		10	6.3Kb	incomplete(40)	transposase,tail	1599300-1605630	0	9	6	3	1	0	no	5	PHAGE_Entero_VT2phi_272_NC_028656(2),PHAGE_Stx2_II_NC_004914(2),PHAGE_Brevib_Sundance_NC_028749(1),PHAGE_Bacill_vB_BhaS_171_NC_030904(1),PHAGE_Salmon_Fels_1_NC_010391(1),PHAGE_Brevib_Jimmer1_NC_029104(1),PHAGE_Lactob_Lb_NC_047983(1),PHAGE_Phage_Gifsy_1_NC_010392(1),PHAGE_Thermo_THSA_485A_NC_018264(1),PHAGE_Stx2_c_1717_NC_011357(1),PHAGE_Entero_BP_4795_NC_004813(1),PHAGE_Brevib_Jimmer2_NC_041976(1…	2	0.2222	47.9
		11	103.6Kb	intact(150)	integrase,lysin,tail,portal,transposase,terminase,head	1678881-1782574	0	142	107	35	1	0	yes	29	PHAGE_Entero_DE3_NC_042057(19),PHAGE_Entero_HK629_NC_019711(17),PHAGE_Entero_HK630_NC_019723(17),PHAGE_Entero_lambda_NC_001416(17),PHAGE_Entero_YYZ_2008_NC_011356(16),PHAGE_Entero_BP_4795_NC_004813(15),PHAGE_Entero_cdtI_NC_009514(14),PHAGE_Entero_mEp460_NC_019716(13),PHAGE_Stx2_c_1717_NC_011357(11),PHAGE_Escher_ArgO145_NC_049918(9),PHAGE_Stx2_c_Stx2a_F451_NC_049924(9),PHAGE_Entero_mEp213_NC_01972…	26	0.1338	50.9
		12	85.4Kb	intact(150)	tail,head,portal,lysis,terminase,integrase,transposase,lysin	2068013-2153419	0	121	104	17	1	0	yes	30	PHAGE_Entero_YYZ_2008_NC_011356(32),PHAGE_Entero_BP_4795_NC_004813(31),PHAGE_Stx2_c_1717_NC_011357(23),PHAGE_Stx2_c_Stx2a_F451_NC_049924(8),PHAGE_Entero_mEp460_NC_019716(7),PHAGE_Entero_cdtI_NC_009514(7),PHAGE_Escher_Lys12581Vzw_NC_049917(6),PHAGE_Entero_VT2_Sakai_NC_000902(6),PHAGE_Shigel_POCJ13_NC_025434(6),PHAGE_Shigel_Stx_NC_029120(5),PHAGE_Entero_933W_NC_000924(5),PHAGE_Escher_ArgO145_NC_049…	58	0.2644	52.7
		13	10.2Kb	incomplete(50)	transposase,tail,integrase	2156347-2166592	0	13	9	4	1	0	no	7	PHAGE_Entero_BP_4795_NC_004813(3),PHAGE_Phage_Gifsy_2_NC_010393(3),PHAGE_Entero_VT2phi_272_NC_028656(2),PHAGE_Entero_YYZ_2008_NC_011356(2),PHAGE_Stx2_II_NC_004914(2),PHAGE_Salmon_118970_sal3_NC_031940(2),PHAGE_Stx2_c_1717_NC_011357(1),PHAGE_Entero_933W_NC_000924(1),PHAGE_Entero_HK225_NC_019717(1),PHAGE_Entero_phiP27_NC_003356(1),PHAGE_Escher_PA28_NC_041935(1),PHAGE_Stx2_c_Stx2a_WGPS9_NC_049923(1)…	3	0.2307	48.5
		14	26.1Kb	intact(150)	integrase,recombinase,transposase,tail	2498400-2524587	0	37	32	5	1	0	yes	9	PHAGE_Entero_P88_NC_026014(18),PHAGE_Escher_520873_NC_049344(17),PHAGE_Escher_503458_NC_049341(10),PHAGE_Escher_500465_2_NC_049343(8),PHAGE_Entero_phiT5282H_NC_049429(6),PHAGE_Escher_PA28_NC_041935(3),PHAGE_Klebsi_3LV2017_NC_047817(3),PHAGE_Haemop_HP2_NC_003315(2),PHAGE_Salmon_RE_2010_NC_019488(2),PHAGE_Stx2_II_NC_004914(2),PHAGE_Burkho_phiE255_NC_009237(1),PHAGE_Salmon_SEN5_NC_028701(1),PHAGE_En…	19	0.4864	50.4
		15	44Kb	intact(130)	portal,tail,capsid,head,transposase	2575618-2619662	0	59	49	10	1	0	yes	25	PHAGE_Entero_BP_4795_NC_004813(15),PHAGE_Entero_YYZ_2008_NC_011356(13),PHAGE_Entero_DE3_NC_042057(12),PHAGE_Entero_HK629_NC_019711(11),PHAGE_Entero_HK630_NC_019723(9),PHAGE_Entero_lambda_NC_001416(9),PHAGE_Stx2_c_1717_NC_011357(9),PHAGE_Phage_Gifsy_1_NC_010392(7),PHAGE_Entero_mEp237_NC_019704(6),PHAGE_Entero_mEp460_NC_019716(6),PHAGE_Entero_phi80_NC_021190(6),PHAGE_Entero_N15_NC_001901(6),PHAGE_E…	13	0.2542	51.9
		16	62.5Kb	intact(150)	tail,head,portal,terminase,lysis,transposase,integrase	2657393-2719919	0	86	78	8	1	0	yes	14	PHAGE_Stx2_c_1717_NC_011357(57),PHAGE_Entero_YYZ_2008_NC_011356(43),PHAGE_Entero_BP_4795_NC_004813(30),PHAGE_Stx2_II_NC_004914(17),PHAGE_Escher_SH2026Stx1_NC_049919(13),PHAGE_Entero_VT2_Sakai_NC_000902(13),PHAGE_Escher_phage_NC_004913(12),PHAGE_Stx2_c_Stx2a_F451_NC_049924(10),PHAGE_Entero_cdtI_NC_009514(9),PHAGE_Escher_PA28_NC_041935(9),PHAGE_Stx2_c_Stx2a_WGPS9_NC_049923(9),PHAGE_Stx2_vB_EcoP_24B…	58	0.6627	50.7
		17	25Kb	intact(150)	tail,plate,lysin,head,capsid,terminase	2804544-2829565	0	36	33	3	1	0	no	7	PHAGE_Escher_pro483_NC_028943(27),PHAGE_Entero_WPhi_NC_005056(18),PHAGE_Yersin_L_413C_NC_004745(17),PHAGE_Escher_P2_NC_041848(17),PHAGE_Entero_fiAA91_ss_NC_022750(16),PHAGE_Escher_vB_EcoM_12474III_NC_049457(14),PHAGE_Escher_pro147_NC_028896(14),PHAGE_Entero_P2_NC_001895(14),PHAGE_Escher_500465_1_NC_049342(4),PHAGE_Escher_500465_2_NC_049343(3),PHAGE_Entero_HK106_NC_019768(2),PHAGE_Entero_HK97_NC_0…	27	0.75	54.9
		18	119Kb	intact(150)	tail,protease,terminase,integrase,transposase,portal,lysin	2880663-2999662	0	141	116	25	1	0	yes	40	PHAGE_Entero_BP_4795_NC_004813(21),PHAGE_Entero_YYZ_2008_NC_011356(19),PHAGE_Entero_cdtI_NC_009514(16),PHAGE_Stx2_c_1717_NC_011357(13),PHAGE_Entero_mEp460_NC_019716(13),PHAGE_Stx2_c_Stx2a_F451_NC_049924(12),PHAGE_Entero_933W_NC_000924(12),PHAGE_Escher_PA28_NC_041935(11),PHAGE_Entero_DE3_NC_042057(10),PHAGE_Escher_SH2026Stx1_NC_049919(9),PHAGE_Escher_ArgO145_NC_049918(9),PHAGE_Entero_c_1_NC_019706…	27	0.1489	51.8
		19	83.2Kb	intact(150)	terminase,capsid,tail,portal,integrase,injection	3219251-3302516	0	88	85	3	1	0	yes	16	PHAGE_Escher_PA28_NC_041935(54),PHAGE_Stx2_c_Stx2a_F451_NC_049924(40),PHAGE_Escher_ArgO145_NC_049918(33),PHAGE_Stx2_c_Stx2a_WGPS9_NC_049923(31),PHAGE_Entero_933W_NC_000924(28),PHAGE_Escher_SH2026Stx1_NC_049919(18),PHAGE_Entero_VT2phi_272_NC_028656(17),PHAGE_Stx2_vB_EcoP_24B_NC_027984(16),PHAGE_Stx2_c_86_NC_008464(14),PHAGE_Escher_Lys12581Vzw_NC_049917(14),PHAGE_Escher_PA2_NC_028449(12),PHAGE_Stx2…	24	0.6136	48.9
		20	13.9Kb	incomplete(60)	tail	3566614-3580589	1	19	13	6	1	0	no	3	PHAGE_Escher_500465_1_NC_049342(12),PHAGE_Entero_mEp460_NC_019716(1),PHAGE_Entero_cdtI_NC_009514(1),PHAGE_Klebsi_ST16_OXA48phi5.4_NC_049450(1),PHAGE_Bacill_G_NC_023719(1),PHAGE_Bacill_SP_15_NC_031245(1),PHAGE_Entero_BP_4795_NC_004813(1),PHAGE_Phage_Gifsy_2_NC_010393(1),PHAGE_Staphy_StauST398_5_NC_023500(1),PHAGE_Entero_YYZ_2008_NC_011356(1),PHAGE_Klebsi_ST15_OXA48phi14.1_NC_049454(1),PHAGE_Klebsi…	11	0.6315	50
		21	20.6Kb	questionable(80)	portal,transposase,tail,integrase	3583765-3604425	0	21	15	6	1	0	yes	9	PHAGE_Stx2_c_1717_NC_011357(6),PHAGE_Entero_BP_4795_NC_004813(5),PHAGE_Entero_YYZ_2008_NC_011356(4),PHAGE_Stx2_II_NC_004914(3),PHAGE_Entero_VT2phi_272_NC_028656(3),PHAGE_Entero_HK544_NC_019767(3),PHAGE_Entero_HK446_NC_019714(3),PHAGE_Escher_ArgO145_NC_049918(2),PHAGE_Escher_Lys12581Vzw_NC_049917(2),PHAGE_Shigel_Sf6_NC_005344(2),PHAGE_Stx2_c_Stx2a_WGPS9_NC_049923(2),PHAGE_Stx2_c_86_NC_008464(2),PH…	6	0.2857	42.5
		22	31.2Kb	questionable(80)	integrase,tail,transposase	3943684-3974943	0	10	7	3	1	0	yes	4	PHAGE_Stx2_c_Stx2a_F451_NC_049924(4),PHAGE_Escher_SH2026Stx1_NC_049919(3),PHAGE_Stx2_c_1717_NC_011357(3),PHAGE_Stx2_c_Stx2a_WGPS9_NC_049923(1),PHAGE_Shigel_POCJ13_NC_025434(1),PHAGE_Escher_ArgO145_NC_049918(1),PHAGE_Entero_933W_NC_000924(1),PHAGE_Entero_BP_4795_NC_004813(1)	4	0.4	46.9
		23	11.8Kb	questionable(80)	transposase	3970101-3981958	0	12	8	4	1	0	no	4	PHAGE_Stx2_c_1717_NC_011357(3),PHAGE_Stx2_c_Stx2a_F451_NC_049924(3),PHAGE_Escher_SH2026Stx1_NC_049919(3),PHAGE_Aeromo_LAh_6_NC_048774(1),PHAGE_Ralsto_RSL1_NC_010811(1),PHAGE_Achrom_Motura_NC_049849(1),PHAGE_Aeromo_LAh9_NC_048776(1),PHAGE_Aeromo_4_4572_NC_048773(1)	5	0.25	48.7
		24	21.7Kb	questionable(70)	tail,capsid,integrase	5175376-5197136	0	24	21	3	1	0	yes	10	PHAGE_Entero_mEp460_NC_019716(10),PHAGE_Entero_YYZ_2008_NC_011356(6),PHAGE_Entero_cdtI_NC_009514(5),PHAGE_Entero_BP_4795_NC_004813(5),PHAGE_Salmon_118970_sal3_NC_031940(3),PHAGE_Stx2_c_1717_NC_011357(3),PHAGE_Salini_SMHB1_NC_047775(2),PHAGE_Pseudo_H66_NC_042342(2),PHAGE_Entero_SfV_NC_003444(2),PHAGE_Shigel_SfIV_NC_022749(2),PHAGE_Pseudo_C5a_NC_047790(2),PHAGE_Salmon_vB_SosS_Oslo_NC_018279(1),PHAG…	10	0.4166	47.5
	pO157	1	23.1Kb	incomplete(60)	transposase,integrase,tail	626-23808	0	25	12	13	1	0	yes	9	PHAGE_Escher_PA28_NC_041935(3),PHAGE_Escher_RCS47_NC_042128(3),PHAGE_Entero_N15_NC_001901(3),PHAGE_Entero_BP_4795_NC_004813(2),PHAGE_Stx2_c_Stx2a_WGPS9_NC_049923(2),PHAGE_Yersin_PY54_NC_005069(2),PHAGE_Entero_VT2phi_272_NC_028656(2),PHAGE_Klebsi_phiKO2_NC_005857(2),PHAGE_Entero_P1_NC_005856(2),PHAGE_Stx2_II_NC_004914(2),PHAGE_Mycoba_SkinnyPete_NC_041882(1),PHAGE_Mycoba_Panchino_NC_031281(1),PHAGE…	3	0.12	47
PNUSA043864	GENOMIC_LOCATION	REGION	REGION_LENGTH	COMPLETENESS(score)	SPECIFIC_KEYWORD	REGION_POSITION	TRNA_NUM	TOTAL_PROTEIN_NUM	PHAGE_HIT_PROTEIN_NUM	HYPOTHETICAL_PROTEIN_NUM	PHAGE+HYPO_PROTEIN_PERCENTAGE	BACTERIAL_PROTEIN_NUM	ATT_SITE_SHOWUP	PHAGE_SPECIES_NUM	MOST_COMMON_PHAGE_NAME(hit_genes_count)	FIRST_MOST_COMMON_PHAGE_NUM	FIRST_MOST_COMMON_PHAGE_PERCENTAGE	GC_PERCENTAGE
	Chromosome	1	13.1Kb	questionable(90)	transposase,tail	840465-853637	0	14	9	5	1	0	no	5	PHAGE_Stx2_c_1717_NC_011357(3),PHAGE_Stx2_II_NC_004914(2),PHAGE_Stx2_c_Stx2a_F451_NC_049924(2),PHAGE_Escher_SH2026Stx1_NC_049919(2),PHAGE_Entero_VT2phi_272_NC_028656(2),PHAGE_Aeromo_4_4572_NC_048773(1),PHAGE_Stx2_c_Stx2a_WGPS9_NC_049923(1),PHAGE_Aeromo_LAh_6_NC_048774(1),PHAGE_Achrom_Motura_NC_049849(1),PHAGE_Aeromo_LAh9_NC_048776(1),PHAGE_Ralsto_RSL1_NC_010811(1),PHAGE_Escher_PA28_NC_041935(1),P…	5	0.2142	49.2
		2	10.2Kb	questionable(70)	transposase,tail,integrase	856881-867108	0	9	7	2	1	0	yes	4	PHAGE_Stx2_c_Stx2a_F451_NC_049924(4),PHAGE_Stx2_c_1717_NC_011357(3),PHAGE_Escher_SH2026Stx1_NC_049919(3),PHAGE_Entero_BP_4795_NC_004813(1),PHAGE_Escher_ArgO145_NC_049918(1),PHAGE_Stx2_c_Stx2a_WGPS9_NC_049923(1),PHAGE_Salmon_SJ46_NC_031129(1)	4	0.4444	47.4
		3	31.9Kb	intact(120)	integrase,transposase,tail	1220929-1252904	1	40	27	13	1	0	yes	15	PHAGE_Escher_500465_1_NC_049342(12),PHAGE_Stx2_c_1717_NC_011357(7),PHAGE_Entero_YYZ_2008_NC_011356(7),PHAGE_Entero_BP_4795_NC_004813(6),PHAGE_Entero_HK544_NC_019767(3),PHAGE_Entero_VT2phi_272_NC_028656(3),PHAGE_Entero_HK446_NC_019714(3),PHAGE_Stx2_II_NC_004914(3),PHAGE_Escher_ArgO145_NC_049918(2),PHAGE_Stx2_c_86_NC_008464(2),PHAGE_Escher_Lys12581Vzw_NC_049917(2),PHAGE_Escher_phage_NC_004913(2),PH…	10	0.3	44.5
		4	6.4Kb	incomplete(20)	integrase	1521012-1527445	0	7	7	0	1	0	yes	5	PHAGE_Shigel_Sf6_NC_005344(4),PHAGE_Salmon_vB_SemP_Emek_NC_018275(2),PHAGE_Entero_Sf101_NC_027398(2),PHAGE_Entero_VT2phi_272_NC_028656(2),PHAGE_Entero_HK633_NC_019719(2),PHAGE_Entero_IME10_NC_019501(2),PHAGE_Escher_ECBP5_NC_027330(1),PHAGE_Entero_IME_EC2_NC_047742(1),PHAGE_Endosy_APSE_1_NC_000935(1),PHAGE_Sodali_phiSG1_NC_007902(1),PHAGE_Pectob_PP99_NC_047802(1),PHAGE_Salmon_UPF_BP1_NC_047875(1),…	2	0.5714	46.1
		5	6.8Kb	incomplete(10)	NA	1921389-1928233	0	10	6	4	1	0	no	5	PHAGE_Entero_BP_4795_NC_004813(2),PHAGE_Escher_PA28_NC_041935(2),PHAGE_Stx2_II_NC_004914(2),PHAGE_Pectob_CBB_NC_041878(2),PHAGE_Stx2_c_Stx2a_WGPS9_NC_049923(2),PHAGE_Yersin_fHe_Yen9_04_NC_042116(1),PHAGE_Stx2_c_1717_NC_011357(1),PHAGE_Pseudo_M6_NC_007809(1),PHAGE_Erwini_phiEaH2_NC_019929(1),PHAGE_Pseudo_pf16_NC_041881(1),PHAGE_Cronob_vB_CsaM_GAP32_NC_019401(1),PHAGE_Pseudo_YuA_NC_010116(1),PHAGE_…	2	0.2	51.9
		6	44Kb	intact(130)	tail,transposase,head,capsid,portal	1956874-2000903	0	61	50	11	1	0	yes	25	PHAGE_Entero_BP_4795_NC_004813(15),PHAGE_Entero_DE3_NC_042057(13),PHAGE_Entero_YYZ_2008_NC_011356(13),PHAGE_Entero_HK629_NC_019711(11),PHAGE_Entero_HK630_NC_019723(9),PHAGE_Entero_lambda_NC_001416(9),PHAGE_Phage_Gifsy_1_NC_010392(7),PHAGE_Stx2_c_1717_NC_011357(7),PHAGE_Entero_phi80_NC_021190(6),PHAGE_Entero_N15_NC_001901(6),PHAGE_Entero_HK225_NC_019717(5),PHAGE_Entero_mEp460_NC_019716(5),PHAGE_En…	14	0.2459	51.9
		7	27Kb	intact(140)	transposase,tail,recombinase,integrase	2049773-2076834	0	33	30	3	1	0	yes	9	PHAGE_Entero_P88_NC_026014(18),PHAGE_Escher_520873_NC_049344(17),PHAGE_Escher_503458_NC_049341(10),PHAGE_Escher_500465_2_NC_049343(8),PHAGE_Entero_phiT5282H_NC_049429(6),PHAGE_Escher_PA28_NC_041935(3),PHAGE_Klebsi_3LV2017_NC_047817(3),PHAGE_Haemop_HP2_NC_003315(2),PHAGE_Salmon_RE_2010_NC_019488(2),PHAGE_Klebsi_ST512_KPC3phi13.2_NC_049452(1),PHAGE_Salmon_SEN4_NC_029015(1),PHAGE_Serrat_Eta_NC_02156…	19	0.5454	49.9
		8	72.6Kb	intact(150)	integrase,transposase,tail,lysis,lysin,terminase,head,portal	2398178-2470869	0	83	63	20	1	0	yes	20	PHAGE_Entero_BP_4795_NC_004813(31),PHAGE_Entero_YYZ_2008_NC_011356(30),PHAGE_Stx2_c_1717_NC_011357(24),PHAGE_Stx2_c_Stx2a_F451_NC_049924(8),PHAGE_Entero_cdtI_NC_009514(5),PHAGE_Escher_Lys12581Vzw_NC_049917(5),PHAGE_Escher_SH2026Stx1_NC_049919(5),PHAGE_Shigel_Stx_NC_029120(4),PHAGE_Phage_Gifsy_2_NC_010393(4),PHAGE_Entero_933W_NC_000924(4),PHAGE_Shigel_POCJ13_NC_025434(4),PHAGE_Entero_mEp460_NC_019…	33	0.3734	50.7
		9	51.5Kb	intact(150)	integrase,lysin,terminase,head,portal,tail	2577886-2629422	0	66	58	8	1	0	yes	23	PHAGE_Entero_BP_4795_NC_004813(28),PHAGE_Entero_YYZ_2008_NC_011356(28),PHAGE_Stx2_c_1717_NC_011357(22),PHAGE_Shigel_POCJ13_NC_025434(6),PHAGE_Phage_Gifsy_2_NC_010393(6),PHAGE_Entero_cdtI_NC_009514(5),PHAGE_Stx2_c_Stx2a_F451_NC_049924(5),PHAGE_Shigel_Stx_NC_029120(5),PHAGE_Pseudo_PAJU2_NC_011373(4),PHAGE_Entero_933W_NC_000924(4),PHAGE_Entero_mEp460_NC_019716(4),PHAGE_Phage_Gifsy_1_NC_010392(4),PHA…	30	0.4242	50.4
		10	89.2Kb	intact(150)	tail,head,capsid,lysin,lysis,terminase,integrase,transposase,portal	2810475-2899768	0	124	110	14	1	0	yes	32	PHAGE_Entero_YYZ_2008_NC_011356(32),PHAGE_Entero_BP_4795_NC_004813(31),PHAGE_Stx2_c_1717_NC_011357(24),PHAGE_Entero_DE3_NC_042057(18),PHAGE_Entero_lambda_NC_001416(17),PHAGE_Entero_HK630_NC_019723(16),PHAGE_Entero_HK629_NC_019711(16),PHAGE_Stx2_c_Stx2a_F451_NC_049924(9),PHAGE_Entero_mEp460_NC_019716(8),PHAGE_Escher_Lys12581Vzw_NC_049917(7),PHAGE_Entero_cdtI_NC_009514(7),PHAGE_Entero_mEp237_NC_019…	50	0.258	52.7
		11	26.3Kb	incomplete(30)	tail,integrase	2890234-2916603	0	13	8	5	1	0	yes	7	PHAGE_Entero_ES18_NC_006949(2),PHAGE_Entero_UAB_Phi20_NC_031019(2),PHAGE_Pectob_ZF40_NC_019522(2),PHAGE_Salmon_118970_sal3_NC_031940(2),PHAGE_Escher_phiV10_NC_007804(2),PHAGE_Entero_mEp390_NC_019721(1),PHAGE_Entero_HK225_NC_019717(1),PHAGE_Entero_phi80_NC_021190(1),PHAGE_Shigel_Stx_NC_029120(1),PHAGE_Entero_P22_NC_002371(1),PHAGE_Entero_mEp237_NC_019704(1),PHAGE_Salmon_ST64B_NC_004313(1),PHAGE_Es…	2	0.1538	49
		12	50.3Kb	intact(110)	tail,lysin,integrase	3002364-3052746	0	49	45	4	1	0	yes	20	PHAGE_Entero_lambda_NC_001416(27),PHAGE_Entero_HK629_NC_019711(25),PHAGE_Entero_DE3_NC_042057(24),PHAGE_Entero_HK630_NC_019723(24),PHAGE_Entero_mEp237_NC_019704(7),PHAGE_Entero_HK225_NC_019717(7),PHAGE_Entero_BP_4795_NC_004813(7),PHAGE_Entero_phi80_NC_021190(5),PHAGE_Entero_cdtI_NC_009514(4),PHAGE_Entero_mEp460_NC_019716(4),PHAGE_Cronob_phiES15_NC_018454(3),PHAGE_Entero_N15_NC_001901(3),PHAGE_Ent…	24	0.551	50.3
		13	21.4Kb	questionable(90)	terminase,head,portal,capsid,integrase	3056126-3077576	0	34	17	17	1	0	yes	16	PHAGE_Salmon_118970_sal3_NC_031940(4),PHAGE_Salmon_ST64B_NC_004313(3),PHAGE_Shigel_SfII_NC_021857(3),PHAGE_Bacill_phi105_NC_048631(2),PHAGE_Psychr_Psymv2_NC_023734(2),PHAGE_Shigel_SfIV_NC_022749(2),PHAGE_Bacill_phIS3501_NC_019502(1),PHAGE_Entero_HK544_NC_019767(1),PHAGE_Entero_P4_NC_001609(1),PHAGE_Klebsi_KpCHEMY26_NC_049467(1),PHAGE_Plankt_PaV_LD_NC_016564(1),PHAGE_Entero_HK97_NC_002167(1),PHAGE…	2	0.1176	50.7
		14	53.9Kb	intact(150)	tail,head,portal,terminase,lysin,lysis,integrase	3086260-3140200	0	66	52	14	1	0	yes	25	PHAGE_Entero_BP_4795_NC_004813(25),PHAGE_Entero_YYZ_2008_NC_011356(23),PHAGE_Stx2_c_1717_NC_011357(18),PHAGE_Escher_Lys12581Vzw_NC_049917(6),PHAGE_Entero_mEp460_NC_019716(6),PHAGE_Entero_VT2_Sakai_NC_000902(5),PHAGE_Shigel_POCJ13_NC_025434(4),PHAGE_Escher_phiV10_NC_007804(3),PHAGE_Stx2_c_Stx2a_F451_NC_049924(3),PHAGE_Salmon_118970_sal3_NC_031940(3),PHAGE_Entero_mEp237_NC_019704(3),PHAGE_Escher_Ar…	23	0.3787	51.4
		15	9.1Kb	questionable(70)	transposase,tail,terminase	3247922-3257116	0	11	8	3	1	0	no	5	PHAGE_Entero_VT2phi_272_NC_028656(2),PHAGE_Stx2_II_NC_004914(2),PHAGE_Escher_vB_EcoM_Schickermooser_NC_048196(1),PHAGE_Escher_phAPEC8_NC_020079(1),PHAGE_Escher_PA28_NC_041935(1),PHAGE_Entero_BP_4795_NC_004813(1),PHAGE_Klebsi_ZCKP1_NC_047994(1),PHAGE_Pseudo_VCM_NC_029065(1),PHAGE_Stx2_c_1717_NC_011357(1),PHAGE_Acinet_vB_AbaM_ME3_NC_041884(1),PHAGE_Caulob_CcrColossus_NC_019406(1),PHAGE_Bacill_Shane…	3	0.1818	51.2
		16	10.7Kb	questionable(70)	transposase	3258507-3269238	0	14	9	5	1	0	no	3	PHAGE_Stx2_c_1717_NC_011357(3),PHAGE_Stx2_c_Stx2a_F451_NC_049924(3),PHAGE_Escher_SH2026Stx1_NC_049919(3),PHAGE_Acinet_vB_AbaM_ME3_NC_041884(2),PHAGE_Entero_BP_4795_NC_004813(1),PHAGE_Clostr_phiCD38_2_NC_015568(1),PHAGE_Clostr_phiCD111_NC_028905(1),PHAGE_Clostr_phiCD146_NC_028958(1)	6	0.2142	53.4
		17	65.9Kb	intact(150)	terminase,head,tail,capsid,integrase	3358961-3424893	0	90	84	6	1	0	yes	14	PHAGE_Stx2_c_Stx2a_F451_NC_049924(45),PHAGE_Stx2_II_NC_004914(44),PHAGE_Entero_VT2_Sakai_NC_000902(42),PHAGE_Entero_933W_NC_000924(38),PHAGE_Stx2_c_Stx2a_WGPS9_NC_049923(36),PHAGE_Escher_phage_NC_004913(26),PHAGE_Escher_ArgO145_NC_049918(25),PHAGE_Escher_PA28_NC_041935(22),PHAGE_Stx2_vB_EcoP_24B_NC_027984(18),PHAGE_Escher_SH2026Stx1_NC_049919(14),PHAGE_Escher_Lys12581Vzw_NC_049917(11),PHAGE_Enter…	25	0.5	49.9
		18	30.7Kb	intact(150)	tail,capsid,head,transposase	3461948-3492734	0	41	32	9	1	0	no	16	PHAGE_Entero_DE3_NC_042057(12),PHAGE_Entero_BP_4795_NC_004813(12),PHAGE_Stx2_c_1717_NC_011357(11),PHAGE_Entero_lambda_NC_001416(10),PHAGE_Entero_YYZ_2008_NC_011356(10),PHAGE_Entero_HK630_NC_019723(9),PHAGE_Entero_HK629_NC_019711(9),PHAGE_Entero_cdtI_NC_009514(6),PHAGE_Phage_Gifsy_1_NC_010392(6),PHAGE_Escher_SH2026Stx1_NC_049919(5),PHAGE_Stx2_c_Stx2a_F451_NC_049924(5),PHAGE_Entero_N15_NC_001901(5)…	13	0.2926	54.2
		19	25.6Kb	incomplete(20)	tail	3485602-3511266	0	29	15	14	1	0	yes	10	PHAGE_Shigel_POCJ13_NC_025434(6),PHAGE_Shigel_Stx_NC_029120(6),PHAGE_Salmon_118970_sal3_NC_031940(5),PHAGE_Entero_mEp237_NC_019704(4),PHAGE_Phage_Gifsy_1_NC_010392(3),PHAGE_Phage_Gifsy_2_NC_010393(3),PHAGE_Salmon_SPN3UB_NC_019545(3),PHAGE_Escher_Lys12581Vzw_NC_049917(2),PHAGE_Salmon_ST64B_NC_004313(2),PHAGE_Entero_HK633_NC_019719(1),PHAGE_Pantoe_vB_PagM_LIET2_NC_048751(1),PHAGE_Pectob_ZF40_NC_019…	6	0.2068	47.3
		20	48.1Kb	intact(150)	tail,protease,portal,terminase,lysin,integrase	3731689-3779880	0	44	36	8	1	0	yes	11	PHAGE_Entero_cdtI_NC_009514(22),PHAGE_Entero_mEp460_NC_019716(21),PHAGE_Salmon_Fels_1_NC_010391(10),PHAGE_Phage_Gifsy_1_NC_010392(9),PHAGE_Entero_c_1_NC_019706(8),PHAGE_Phage_Gifsy_2_NC_010393(8),PHAGE_Entero_mEp213_NC_019720(7),PHAGE_Entero_BP_4795_NC_004813(6),PHAGE_Stx2_c_1717_NC_011357(5),PHAGE_Entero_YYZ_2008_NC_011356(4),PHAGE_Stx2_c_Stx2a_F451_NC_049924(4),PHAGE_Entero_lambda_NC_001416(4),…	23	0.5	50.1
		21	27.8Kb	intact(110)	integrase,tail,transposase,plate	4352933-4380749	0	18	17	1	1	0	yes	13	PHAGE_Entero_SfI_NC_027339(5),PHAGE_Entero_lambda_NC_001416(4),PHAGE_Escher_pro483_NC_028943(4),PHAGE_Escher_PA28_NC_041935(3),PHAGE_Entero_BP_4795_NC_004813(3),PHAGE_Escher_P2_NC_041848(3),PHAGE_Salmon_SEN34_NC_028699(3),PHAGE_Escher_500465_2_NC_049343(3),PHAGE_Entero_c_1_NC_019706(2),PHAGE_Entero_mEp234_NC_019715(2),PHAGE_Entero_VT2phi_272_NC_028656(2),PHAGE_Entero_HK106_NC_019768(2),PHAGE_Ente…	4	0.2777	45.9
		22	37.4Kb	intact(150)	transposase,tail,portal,virion,protease,head,plate	4458600-4496018	0	50	45	5	1	0	no	12	PHAGE_Entero_Mu_NC_000929(34),PHAGE_Entero_SfMu_NC_027382(33),PHAGE_Escher_D108_NC_013594(32),PHAGE_Vibrio_12B12_NC_021070(15),PHAGE_Entero_SfV_NC_003444(3),PHAGE_Pseudo_JBD93_NC_030918(3),PHAGE_Escher_SH2026Stx1_NC_049919(3),PHAGE_Bacter_APSE_2_NC_011551(2),PHAGE_Pseudo_FHA0480_NC_041851(2),PHAGE_Haemop_SuMu_NC_019455(2),PHAGE_Burkho_BcepMu_NC_005882(2),PHAGE_Escher_P13374_NC_018846(2),PHAGE_Erw…	32	0.68	53.7
	pO157	1	23.2Kb	incomplete(40)	integrase,tail,transposase	36710-59957	0	9	6	3	1	0	yes	5	PHAGE_Escher_RCS47_NC_042128(2),PHAGE_Entero_VT2phi_272_NC_028656(2),PHAGE_Stx2_II_NC_004914(2),PHAGE_Entero_N15_NC_001901(2),PHAGE_Klebsi_phiKO2_NC_005857(2),PHAGE_Yersin_PY54_NC_005069(2),PHAGE_Brevib_Jenst_NC_028805(1),PHAGE_Entero_P1_NC_005856(1),PHAGE_Escher_PA28_NC_041935(1),PHAGE_Stx2_c_1717_NC_011357(1),PHAGE_Mycoba_SkinnyPete_NC_041882(1),PHAGE_Mycoba_Charlie_NC_023729(1),PHAGE_Pseudo_ph…	2	0.2222	46.6
2019C-3201	GENOMIC_LOCATION	REGION	REGION_LENGTH	COMPLETENESS(score)	SPECIFIC_KEYWORD	REGION_POSITION	TRNA_NUM	TOTAL_PROTEIN_NUM	PHAGE_HIT_PROTEIN_NUM	HYPOTHETICAL_PROTEIN_NUM	PHAGE+HYPO_PROTEIN_PERCENTAGE	BACTERIAL_PROTEIN_NUM	ATT_SITE_SHOWUP	PHAGE_SPECIES_NUM	MOST_COMMON_PHAGE_NAME(hit_genes_count)	FIRST_MOST_COMMON_PHAGE_NUM	FIRST_MOST_COMMON_PHAGE_PERCENTAGE	GC_PERCENTAGE
	Chromosome	1	24.7Kb	intact(110)	integrase,tail,plate,transposase	85484-110269	0	17	17	0	1	0	yes	13	PHAGE_Entero_SfI_NC_027339(5),PHAGE_Escher_500465_2_NC_049343(4),PHAGE_Escher_pro483_NC_028943(4),PHAGE_Entero_lambda_NC_001416(4),PHAGE_Escher_P2_NC_041848(3),PHAGE_Escher_PA28_NC_041935(3),PHAGE_Salmon_SEN34_NC_028699(3),PHAGE_Entero_BP_4795_NC_004813(3),PHAGE_Entero_HK97_NC_002167(2),PHAGE_Entero_c_1_NC_019706(2),PHAGE_Stx2_II_NC_004914(2),PHAGE_Entero_mEp234_NC_019715(2),PHAGE_Entero_VT2phi_2…	4	0.2941	44
		2	38.5Kb	intact(150)	integrase,lysin,lysis,terminase,portal,protease,tail	677434-716020	0	44	37	7	1	0	yes	11	PHAGE_Entero_mEp460_NC_019716(21),PHAGE_Entero_cdtI_NC_009514(21),PHAGE_Salmon_Fels_1_NC_010391(10),PHAGE_Phage_Gifsy_1_NC_010392(9),PHAGE_Phage_Gifsy_2_NC_010393(8),PHAGE_Entero_c_1_NC_019706(8),PHAGE_Entero_BP_4795_NC_004813(7),PHAGE_Entero_mEp213_NC_019720(7),PHAGE_Stx2_c_1717_NC_011357(6),PHAGE_Stx2_c_Stx2a_F451_NC_049924(4),PHAGE_Entero_DE3_NC_042057(4),PHAGE_Entero_YYZ_2008_NC_011356(4),PHA…	22	0.4772	49.3
		3	16.3Kb	incomplete(20)	tail	947349-963734	0	22	11	11	1	0	yes	8	PHAGE_Salmon_118970_sal3_NC_031940(5),PHAGE_Shigel_Stx_NC_029120(4),PHAGE_Shigel_POCJ13_NC_025434(4),PHAGE_Salmon_SPN3UB_NC_019545(2),PHAGE_Salmon_ST64B_NC_004313(2),PHAGE_Phage_Gifsy_2_NC_010393(2),PHAGE_Phage_Gifsy_1_NC_010392(2),PHAGE_Entero_mEp237_NC_019704(2),PHAGE_Salico_CGphi29_NC_020844(1),PHAGE_Shigel_SfIV_NC_022749(1),PHAGE_Acinet_YMC11/11/R3177_NC_041866(1),PHAGE_Entero_SfV_NC_003444(1…	4	0.2272	46.6
		4	30.7Kb	intact(150)	transposase,tail,head,capsid	964668-995454	0	40	32	8	1	0	no	17	PHAGE_Entero_DE3_NC_042057(12),PHAGE_Entero_BP_4795_NC_004813(11),PHAGE_Entero_lambda_NC_001416(10),PHAGE_Entero_YYZ_2008_NC_011356(10),PHAGE_Stx2_c_1717_NC_011357(10),PHAGE_Entero_HK629_NC_019711(9),PHAGE_Entero_HK630_NC_019723(9),PHAGE_Phage_Gifsy_1_NC_010392(6),PHAGE_Entero_cdtI_NC_009514(6),PHAGE_Entero_N15_NC_001901(5),PHAGE_Stx2_c_Stx2a_F451_NC_049924(4),PHAGE_Escher_SH2026Stx1_NC_049919(4)…	13	0.3	54.2
		5	70.4Kb	intact(140)	integrase,tail,capsid,terminase,head	1032372-1102866	0	87	83	4	1	0	yes	14	PHAGE_Stx2_II_NC_004914(45),PHAGE_Stx2_c_Stx2a_F451_NC_049924(45),PHAGE_Entero_VT2_Sakai_NC_000902(44),PHAGE_Entero_933W_NC_000924(39),PHAGE_Stx2_c_Stx2a_WGPS9_NC_049923(35),PHAGE_Escher_phage_NC_004913(27),PHAGE_Escher_ArgO145_NC_049918(24),PHAGE_Escher_PA28_NC_041935(21),PHAGE_Stx2_vB_EcoP_24B_NC_027984(20),PHAGE_Escher_SH2026Stx1_NC_049919(13),PHAGE_Entero_Min27_NC_010237(11),PHAGE_Escher_Lys1…	26	0.5172	50.3
		6	28.6Kb	questionable(80)	integrase,transposase	1156949-1185624	0	17	9	8	1	0	yes	6	PHAGE_Escher_SH2026Stx1_NC_049919(3),PHAGE_Stx2_c_1717_NC_011357(3),PHAGE_Stx2_c_Stx2a_F451_NC_049924(3),PHAGE_Vibrio_SIO_2_NC_016567(1),PHAGE_Stenot_S1_NC_011589(1),PHAGE_Burkho_KL3_NC_015266(1),PHAGE_Stenot_vB_SmaS_DLP_5_NC_042082(1),PHAGE_Entero_P1_NC_005856(1),PHAGE_Shigel_SfIV_NC_022749(1),PHAGE_Klebsi_Sugarland_NC_042093(1),PHAGE_Ralsto_RSY1_NC_025115(1),PHAGE_Escher_RCS47_NC_042128(1),PHAG…	3	0.1764	46
		7	39.6Kb	intact(150)	transposase,tail,portal,virion,protease,head,plate	1183539-1223161	0	60	47	13	1	0	no	13	PHAGE_Entero_Mu_NC_000929(34),PHAGE_Entero_SfMu_NC_027382(33),PHAGE_Escher_D108_NC_013594(32),PHAGE_Vibrio_12B12_NC_021070(15),PHAGE_Pseudo_JBD93_NC_030918(3),PHAGE_Escher_SH2026Stx1_NC_049919(3),PHAGE_Entero_SfV_NC_003444(3),PHAGE_Mannhe_vB_MhM_3927AP2_NC_028766(2),PHAGE_Stx2_c_Stx2a_WGPS9_NC_049923(2),PHAGE_Burkho_BcepMu_NC_005882(2),PHAGE_Entero_phiP27_NC_003356(2),PHAGE_Escher_ArgO145_NC_0499…	32	0.5666	53.4
		8	10.7Kb	questionable(80)	transposase,tail	1226237-1236968	0	13	10	3	1	0	no	3	PHAGE_Acinet_vB_AbaM_ME3_NC_041884(3),PHAGE_Stx2_c_Stx2a_F451_NC_049924(3),PHAGE_Escher_SH2026Stx1_NC_049919(3),PHAGE_Stx2_c_1717_NC_011357(3),PHAGE_Entero_BP_4795_NC_004813(1),PHAGE_Clostr_phiCD146_NC_028958(1),PHAGE_Clostr_phiCD38_2_NC_015568(1),PHAGE_Clostr_phiCD111_NC_028905(1)	6	0.2307	53.4
		9	9.1Kb	questionable(70)	tail,terminase,transposase	1238359-1247553	0	11	8	3	1	0	no	5	PHAGE_Stx2_II_NC_004914(2),PHAGE_Entero_VT2phi_272_NC_028656(2),PHAGE_Caulob_CcrColossus_NC_019406(1),PHAGE_Erwini_vB_EamM_Caitlin_NC_031120(1),PHAGE_Escher_ESCO13_NC_047770(1),PHAGE_Bacill_CP_51_NC_025423(1),PHAGE_Stx2_c_Stx2a_WGPS9_NC_049923(1),PHAGE_Bacill_Shanette_NC_028983(1),PHAGE_Acinet_vB_AbaM_ME3_NC_041884(1),PHAGE_Caulob_CcrPW_NC_048046(1),PHAGE_Erwini_vB_EamM_ChrisDB_NC_031126(1),PHAGE…	3	0.1818	51.2
		10	52.8Kb	intact(150)	integrase,tail,lysin,terminase,head,portal	1365825-1418667	0	62	50	12	1	0	yes	24	PHAGE_Entero_BP_4795_NC_004813(25),PHAGE_Entero_YYZ_2008_NC_011356(23),PHAGE_Stx2_c_1717_NC_011357(18),PHAGE_Entero_mEp460_NC_019716(6),PHAGE_Shigel_POCJ13_NC_025434(3),PHAGE_Escher_Lys12581Vzw_NC_049917(3),PHAGE_Shigel_Ss_VASD_NC_028685(3),PHAGE_Entero_VT2_Sakai_NC_000902(3),PHAGE_Shigel_Stx_NC_029120(3),PHAGE_Stx2_c_86_NC_008464(3),PHAGE_Escher_ECP1_NC_049926(3),PHAGE_Salmon_118970_sal3_NC_0319…	24	0.4032	49.3
		11	17.4Kb	questionable(70)	integrase,capsid,head,terminase	1421541-1439007	0	29	14	15	1	0	yes	12	PHAGE_Salmon_118970_sal3_NC_031940(4),PHAGE_Salmon_ST64B_NC_004313(3),PHAGE_Shigel_SfII_NC_021857(3),PHAGE_Bacill_phi105_NC_048631(2),PHAGE_Shigel_SfIV_NC_022749(2),PHAGE_Psychr_Psymv2_NC_023734(2),PHAGE_Geobac_E2_NC_009552(1),PHAGE_Staphy_PT1028_NC_007045(1),PHAGE_Salmon_Fels_1_NC_010391(1),PHAGE_Staphy_Ipla88_NC_011614(1),PHAGE_Bacill_WBeta_NC_007734(1),PHAGE_Strept_9874_NC_031023(1),PHAGE_Burk…	3	0.1379	50.9
		12	50.9Kb	intact(110)	integrase,lysin,tail	1442387-1493359	0	45	42	3	1	0	yes	17	PHAGE_Entero_lambda_NC_001416(25),PHAGE_Entero_DE3_NC_042057(25),PHAGE_Entero_HK629_NC_019711(24),PHAGE_Entero_HK630_NC_019723(23),PHAGE_Entero_HK225_NC_019717(7),PHAGE_Entero_mEp237_NC_019704(7),PHAGE_Entero_BP_4795_NC_004813(6),PHAGE_Entero_phi80_NC_021190(5),PHAGE_Entero_cdtI_NC_009514(4),PHAGE_Entero_mEp460_NC_019716(4),PHAGE_Cronob_phiES15_NC_018454(3),PHAGE_Entero_N15_NC_001901(3),PHAGE_Ent…	25	0.5555	50.3
		13	6.3Kb	incomplete(40)	transposase,tail	1489464-1495794	0	9	6	3	1	0	no	5	PHAGE_Entero_VT2phi_272_NC_028656(2),PHAGE_Stx2_II_NC_004914(2),PHAGE_Stx2_c_1717_NC_011357(1),PHAGE_Brevib_Sundance_NC_028749(1),PHAGE_Brevib_Jimmer2_NC_041976(1),PHAGE_Thermo_THSA_485A_NC_018264(1),PHAGE_Bacill_vB_BhaS_171_NC_030904(1),PHAGE_Salmon_Fels_1_NC_010391(1),PHAGE_Brevib_Jimmer1_NC_029104(1),PHAGE_Phage_Gifsy_1_NC_010392(1),PHAGE_Escher_PA28_NC_041935(1),PHAGE_Lactob_Lb_NC_047983(1),P…	2	0.2222	47.9
		14	57.2Kb	intact(150)	integrase,tail,lysin,terminase,head,portal,transposase	1582777-1640032	0	75	54	21	1	0	yes	17	PHAGE_Entero_BP_4795_NC_004813(29),PHAGE_Entero_YYZ_2008_NC_011356(27),PHAGE_Stx2_c_1717_NC_011357(24),PHAGE_Stx2_c_Stx2a_F451_NC_049924(7),PHAGE_Escher_Lys12581Vzw_NC_049917(6),PHAGE_Entero_cdtI_NC_009514(6),PHAGE_Escher_SH2026Stx1_NC_049919(5),PHAGE_Entero_mEp460_NC_019716(5),PHAGE_Entero_HK446_NC_019714(3),PHAGE_Escher_ECP1_NC_049926(3),PHAGE_Salmon_118970_sal3_NC_031940(3),PHAGE_Entero_VT2_Sa…	28	0.3866	50.4
		15	51.7Kb	intact(150)	integrase,lysin,terminase,head,portal,tail	1746599-1798321	0	68	60	8	1	0	yes	25	PHAGE_Entero_YYZ_2008_NC_011356(28),PHAGE_Entero_BP_4795_NC_004813(28),PHAGE_Stx2_c_1717_NC_011357(22),PHAGE_Phage_Gifsy_2_NC_010393(6),PHAGE_Shigel_POCJ13_NC_025434(6),PHAGE_Shigel_Stx_NC_029120(5),PHAGE_Entero_cdtI_NC_009514(5),PHAGE_Stx2_c_Stx2a_F451_NC_049924(5),PHAGE_Entero_mEp460_NC_019716(4),PHAGE_Entero_933W_NC_000924(4),PHAGE_Phage_Gifsy_1_NC_010392(4),PHAGE_Pseudo_PAJU2_NC_011373(4),PHA…	30	0.4117	50.4
		16	95.2Kb	intact(150)	tail,head,capsid,lysin,lysis,terminase,integrase,transposase,portal	1977393-2072613	0	133	113	20	1	0	yes	34	PHAGE_Entero_YYZ_2008_NC_011356(31),PHAGE_Entero_BP_4795_NC_004813(30),PHAGE_Stx2_c_1717_NC_011357(22),PHAGE_Entero_DE3_NC_042057(18),PHAGE_Entero_lambda_NC_001416(17),PHAGE_Entero_HK630_NC_019723(16),PHAGE_Entero_HK629_NC_019711(16),PHAGE_Stx2_c_Stx2a_F451_NC_049924(8),PHAGE_Entero_cdtI_NC_009514(8),PHAGE_Entero_mEp237_NC_019704(7),PHAGE_Entero_mEp460_NC_019716(7),PHAGE_Entero_HK225_NC_019717(6)…	49	0.233	52.5
		17	26.1Kb	intact(150)	integrase,recombinase,transposase,tail	2416595-2442779	0	37	33	4	1	0	yes	11	PHAGE_Entero_P88_NC_026014(19),PHAGE_Escher_520873_NC_049344(17),PHAGE_Escher_503458_NC_049341(10),PHAGE_Escher_500465_2_NC_049343(8),PHAGE_Entero_phiT5282H_NC_049429(6),PHAGE_Escher_PA28_NC_041935(3),PHAGE_Klebsi_3LV2017_NC_047817(3),PHAGE_Entero_VT2phi_272_NC_028656(2),PHAGE_Entero_BP_4795_NC_004813(2),PHAGE_Stx2_II_NC_004914(2),PHAGE_Haemop_HP2_NC_003315(2),PHAGE_Salmon_RE_2010_NC_019488(2),PH…	20	0.5135	50.4
		18	44Kb	intact(130)	portal,tail,capsid,head,transposase	2493810-2537839	0	60	50	10	1	0	yes	25	PHAGE_Entero_BP_4795_NC_004813(15),PHAGE_Entero_DE3_NC_042057(13),PHAGE_Entero_YYZ_2008_NC_011356(13),PHAGE_Entero_HK629_NC_019711(11),PHAGE_Entero_lambda_NC_001416(9),PHAGE_Entero_HK630_NC_019723(9),PHAGE_Stx2_c_1717_NC_011357(8),PHAGE_Phage_Gifsy_1_NC_010392(7),PHAGE_Entero_phi80_NC_021190(6),PHAGE_Entero_N15_NC_001901(6),PHAGE_Entero_mEp237_NC_019704(6),PHAGE_Salmon_118970_sal3_NC_031940(5),PH…	14	0.25	51.9
		19	6.8Kb	incomplete(10)	NA	2566510-2573354	0	10	6	4	1	0	no	5	PHAGE_Escher_PA28_NC_041935(2),PHAGE_Stx2_c_Stx2a_WGPS9_NC_049923(2),PHAGE_Entero_BP_4795_NC_004813(2),PHAGE_Stx2_II_NC_004914(2),PHAGE_Pectob_CBB_NC_041878(2),PHAGE_Salmon_SPN3US_NC_027402(1),PHAGE_Pseudo_YuA_NC_010116(1),PHAGE_Cronob_vB_CsaM_GAP32_NC_019401(1),PHAGE_Erwini_vB_EamM_Machina_NC_042056(1),PHAGE_Rhodot_RM378_NC_004735(1),PHAGE_Erwini_phiEaH2_NC_019929(1),PHAGE_Pseudo_M6_NC_007809(1)…	2	0.2	51.9
		20	9.6Kb	incomplete(20)	integrase	2967298-2976910	0	6	6	0	1	0	yes	4	PHAGE_Shigel_Sf6_NC_005344(4),PHAGE_Entero_VT2phi_272_NC_028656(2),PHAGE_Entero_Sf101_NC_027398(2),PHAGE_Salmon_vB_SemP_Emek_NC_018275(2),PHAGE_Entero_IME10_NC_019501(2),PHAGE_Salmon_SEN22_NC_028696(1),PHAGE_Pectob_PP99_NC_047802(1),PHAGE_Entero_IME_EC2_NC_047742(1),PHAGE_Escher_ECBP5_NC_027330(1),PHAGE_Salmon_UPF_BP1_NC_047875(1),PHAGE_Edward_GF_2_NC_026611(1),PHAGE_Sodali_phiSG1_NC_007902(1),PH…	2	0.6666	43.6
		21	45.7Kb	intact(110)	tail,transposase,integrase	3228112-3273826	1	39	25	14	1	0	yes	15	PHAGE_Escher_500465_1_NC_049342(12),PHAGE_Entero_BP_4795_NC_004813(6),PHAGE_Stx2_c_1717_NC_011357(5),PHAGE_Entero_YYZ_2008_NC_011356(5),PHAGE_Entero_VT2phi_272_NC_028656(3),PHAGE_Stx2_II_NC_004914(3),PHAGE_Escher_SH2026Stx1_NC_049919(2),PHAGE_Escher_ArgO145_NC_049918(2),PHAGE_Escher_phage_NC_004913(2),PHAGE_Stx2_c_Stx2a_F451_NC_049924(2),PHAGE_Entero_cdtI_NC_009514(2),PHAGE_Entero_HK446_NC_019714…	10	0.3076	46
		22	32.5Kb	questionable(80)	integrase,tail,transposase	3614701-3647275	0	9	7	2	1	0	yes	4	PHAGE_Stx2_c_Stx2a_F451_NC_049924(4),PHAGE_Stx2_c_1717_NC_011357(3),PHAGE_Escher_SH2026Stx1_NC_049919(3),PHAGE_Entero_BP_4795_NC_004813(1),PHAGE_Escher_ArgO145_NC_049918(1),PHAGE_Salmon_SJ46_NC_031129(1),PHAGE_Stx2_c_Stx2a_WGPS9_NC_049923(1)	4	0.4444	47.2
		23	13.1Kb	questionable(90)	transposase,tail	3641118-3654290	0	14	9	5	1	0	no	5	PHAGE_Stx2_c_1717_NC_011357(3),PHAGE_Stx2_c_Stx2a_F451_NC_049924(2),PHAGE_Stx2_II_NC_004914(2),PHAGE_Entero_VT2phi_272_NC_028656(2),PHAGE_Escher_SH2026Stx1_NC_049919(2),PHAGE_Aeromo_LAh9_NC_048776(1),PHAGE_Entero_BP_4795_NC_004813(1),PHAGE_Stx2_c_Stx2a_WGPS9_NC_049923(1),PHAGE_Escher_PA28_NC_041935(1),PHAGE_Aeromo_LAh_6_NC_048774(1),PHAGE_Aeromo_4_4572_NC_048773(1),PHAGE_Achrom_Motura_NC_049849(1…	5	0.2142	49.2
		24	37.4Kb	intact(150)	tail,plate,head,protease,virion,portal,transposase	5449801-5487219	0	51	45	6	1	0	no	12	PHAGE_Entero_Mu_NC_000929(34),PHAGE_Entero_SfMu_NC_027382(33),PHAGE_Escher_D108_NC_013594(32),PHAGE_Vibrio_12B12_NC_021070(15),PHAGE_Pseudo_JBD93_NC_030918(3),PHAGE_Entero_SfV_NC_003444(3),PHAGE_Escher_SH2026Stx1_NC_049919(3),PHAGE_Haemop_SuMu_NC_019455(2),PHAGE_Pseudo_JBD25_NC_027992(2),PHAGE_Pseudo_FHA0480_NC_041851(2),PHAGE_Burkho_BcepMu_NC_005882(2),PHAGE_Entero_phiP27_NC_003356(2),PHAGE_Erwi…	32	0.6666	53.7
	p2019C-3201_1	1	9.1Kb	incomplete(40)	tail,capsid,transposase	1289-10466	0	17	7	10	1	0	no	7	PHAGE_Serrat_Eta_NC_021563(1),PHAGE_Erwini_PEp14_NC_016767(1),PHAGE_Escher_Lys12581Vzw_NC_049917(1),PHAGE_Rhodoc_Takoda_NC_048708(1),PHAGE_Escher_phi191_NC_028660(1),PHAGE_Escher_P13374_NC_018846(1),PHAGE_Cronob_vB_CsaM_GAP32_NC_019401(1),PHAGE_Gordon_Schwabeltier_NC_031255(1),PHAGE_Serrat_BF_NC_041917(1),PHAGE_Entero_N15_NC_001901(1),PHAGE_Sodali_phiSG1_NC_007902(1),PHAGE_Aeromo_vB_AsaM_56_NC_01…	1	0.0588	56.5
	p2019C-3201_2	1	9.5Kb	incomplete(20)	terminase	34063-43619	0	10	6	4	1	0	no	6	PHAGE_Entero_933W_NC_000924(3),PHAGE_Stx2_c_Stx2a_WGPS9_NC_049923(3),PHAGE_Entero_VT2_Sakai_NC_000902(2),PHAGE_Mycoba_Adler_NC_023591(2),PHAGE_Xantho_Xf109_NC_043028(1),PHAGE_Staphy_CNPH82_NC_008722(1),PHAGE_Staphy_6ec_NC_024355(1),PHAGE_Sinorh_phiM9_NC_028676(1),PHAGE_Entero_Min27_NC_010237(1),PHAGE_Stx2_II_NC_004914(1),PHAGE_Staphy_CNPx_NC_031241(1)	1	0.3	54.7
	p2019C-3201_3	1	23.9Kb	incomplete(40)	transposase,tail,integrase	68534-92494	0	9	6	3	1	0	yes	5	PHAGE_Entero_N15_NC_001901(2),PHAGE_Stx2_II_NC_004914(2),PHAGE_Escher_RCS47_NC_042128(2),PHAGE_Entero_VT2phi_272_NC_028656(2),PHAGE_Yersin_PY54_NC_005069(2),PHAGE_Klebsi_phiKO2_NC_005857(2),PHAGE_Mycoba_Panchino_NC_031281(1),PHAGE_Pseudo_phi3_NC_030940(1),PHAGE_Stx2_c_Stx2a_WGPS9_NC_049923(1),PHAGE_Faecal_FP_Toutatis_NC_047915(1),PHAGE_Mycoba_Squirty_NC_026588(1),PHAGE_Entero_P1_NC_005856(1),PHAG…	2	0.2222	54.3
TW14588	GENOMIC_LOCATION	REGION	REGION_LENGTH	COMPLETENESS(score)	SPECIFIC_KEYWORD	REGION_POSITION	TRNA_NUM	TOTAL_PROTEIN_NUM	PHAGE_HIT_PROTEIN_NUM	HYPOTHETICAL_PROTEIN_NUM	PHAGE+HYPO_PROTEIN_PERCENTAGE	BACTERIAL_PROTEIN_NUM	ATT_SITE_SHOWUP	PHAGE_SPECIES_NUM	MOST_COMMON_PHAGE_NAME(hit_genes_count)	FIRST_MOST_COMMON_PHAGE_NUM	FIRST_MOST_COMMON_PHAGE_PERCENTAGE	GC_PERCENTAGE
	Chromosome	1	30.7Kb	intact(150)	tail,capsid,head,transposase	42414-73199	0	40	31	9	1	0	no	17	PHAGE_Entero_DE3_NC_042057(12),PHAGE_Entero_BP_4795_NC_004813(11),PHAGE_Entero_YYZ_2008_NC_011356(10),PHAGE_Stx2_c_1717_NC_011357(10),PHAGE_Entero_lambda_NC_001416(9),PHAGE_Entero_HK630_NC_019723(9),PHAGE_Entero_HK629_NC_019711(9),PHAGE_Phage_Gifsy_1_NC_010392(6),PHAGE_Entero_cdtI_NC_009514(6),PHAGE_Entero_N15_NC_001901(5),PHAGE_Escher_SH2026Stx1_NC_049919(4),PHAGE_Stx2_c_Stx2a_F451_NC_049924(4),…	12	0.3	54.2
		2	24.1Kb	incomplete(20)	tail	66066-90244	0	23	13	10	1	0	yes	8	PHAGE_Shigel_Stx_NC_029120(6),PHAGE_Shigel_POCJ13_NC_025434(6),PHAGE_Salmon_118970_sal3_NC_031940(5),PHAGE_Entero_mEp237_NC_019704(2),PHAGE_Salmon_ST64B_NC_004313(2),PHAGE_Phage_Gifsy_2_NC_010393(2),PHAGE_Escher_Lys12581Vzw_NC_049917(2),PHAGE_Salmon_SPN3UB_NC_019545(2),PHAGE_Phage_Gifsy_1_NC_010392(2),PHAGE_Entero_VT2phi_272_NC_028656(1),PHAGE_Entero_SfV_NC_003444(1),PHAGE_Shigel_SfIV_NC_022749(1…	6	0.2608	47.4
		3	19.6Kb	incomplete(50)	head,terminase,integrase,portal	194621-214309	0	18	8	10	1	0	yes	7	PHAGE_Entero_P4_NC_001609(2),PHAGE_Stx2_c_1717_NC_011357(2),PHAGE_Entero_BP_4795_NC_004813(2),PHAGE_Entero_YYZ_2008_NC_011356(2),PHAGE_Entero_cdtI_NC_009514(1),PHAGE_Vibrio_1.026.O._10N.222.49.C7_NC_049430(1),PHAGE_Lactoc_bIL312_NC_002671(1),PHAGE_Entero_mEp234_NC_019715(1),PHAGE_Bacill_SPbeta_NC_001884(1),PHAGE_Strept_YDN12_NC_028974(1),PHAGE_Salmon_Fels_1_NC_010391(1),PHAGE_Bacill_G_NC_023719(1…	2	0.1111	48.7
		4	48.1Kb	intact(150)	tail,protease,portal,terminase,lysis,lysin,integrase	321339-369531	0	42	37	5	1	0	yes	12	PHAGE_Entero_mEp460_NC_019716(21),PHAGE_Entero_cdtI_NC_009514(21),PHAGE_Salmon_Fels_1_NC_010391(10),PHAGE_Phage_Gifsy_1_NC_010392(9),PHAGE_Phage_Gifsy_2_NC_010393(8),PHAGE_Entero_c_1_NC_019706(8),PHAGE_Entero_mEp213_NC_019720(7),PHAGE_Entero_BP_4795_NC_004813(7),PHAGE_Stx2_c_1717_NC_011357(5),PHAGE_Entero_lambda_NC_001416(4),PHAGE_Stx2_c_Stx2a_F451_NC_049924(4),PHAGE_Entero_HK630_NC_019723(4),PHA…	22	0.5	50.1
		5	41.4Kb	intact(150)	transposase,tail,portal,virion,protease,head,plate	821214-862641	0	57	49	8	1	0	no	14	PHAGE_Entero_Mu_NC_000929(34),PHAGE_Entero_SfMu_NC_027382(33),PHAGE_Escher_D108_NC_013594(32),PHAGE_Vibrio_12B12_NC_021070(15),PHAGE_Entero_SfV_NC_003444(3),PHAGE_Pseudo_JBD93_NC_030918(3),PHAGE_Escher_SH2026Stx1_NC_049919(3),PHAGE_Erwini_vB_EhrS_49_NC_048197(2),PHAGE_Pseudo_JBD25_NC_027992(2),PHAGE_Erwini_vB_EhrS_59_NC_048198(2),PHAGE_Pseudo_FHA0480_NC_041851(2),PHAGE_Burkho_BcepMu_NC_005882(2),…	32	0.5964	53.2
		6	12.7Kb	incomplete(50)	tail,head,transposase	973344-986103	0	15	10	5	1	0	no	5	PHAGE_Entero_P4_NC_001609(6),PHAGE_Stx2_II_NC_004914(2),PHAGE_Entero_VT2phi_272_NC_028656(2),PHAGE_Escher_PA28_NC_041935(1),PHAGE_Stx2_c_1717_NC_011357(1),PHAGE_Entero_N15_NC_001901(1),PHAGE_Shewan_1/41_NC_025458(1),PHAGE_Stenot_S1_NC_011589(1),PHAGE_Pantoe_vB_PagM_AAM37_NC_048766(1),PHAGE_Serrat_Eta_NC_021563(1),PHAGE_Pantoe_vB_PagM_PSKM_NC_048767(1),PHAGE_Entero_phiP27_NC_003356(1),PHAGE_Ralsto…	6	0.4	45.6
		7	24.6Kb	questionable(90)	integrase,transposase,plate,tail	984805-1009444	0	16	16	0	1	0	yes	10	PHAGE_Entero_SfI_NC_027339(5),PHAGE_Escher_pro483_NC_028943(5),PHAGE_Entero_lambda_NC_001416(4),PHAGE_Escher_P2_NC_041848(3),PHAGE_Salmon_SEN34_NC_028699(3),PHAGE_Entero_HK97_NC_002167(3),PHAGE_Escher_500465_2_NC_049343(3),PHAGE_Entero_HK106_NC_019768(2),PHAGE_Escher_500465_1_NC_049342(2),PHAGE_Entero_BP_4795_NC_004813(2),PHAGE_Entero_SfV_NC_003444(2),PHAGE_Shigel_SfII_NC_021857(2),PHAGE_Entero_m…	5	0.3125	46.5
		8	13.1Kb	questionable(80)	transposase,tail	2893613-2906785	0	13	8	5	1	0	no	4	PHAGE_Stx2_c_1717_NC_011357(3),PHAGE_Stx2_II_NC_004914(2),PHAGE_Stx2_c_Stx2a_F451_NC_049924(2),PHAGE_Entero_VT2phi_272_NC_028656(2),PHAGE_Escher_SH2026Stx1_NC_049919(2),PHAGE_Escher_PA28_NC_041935(1),PHAGE_Aeromo_LAh_6_NC_048774(1),PHAGE_Entero_BP_4795_NC_004813(1),PHAGE_Aeromo_LAh9_NC_048776(1),PHAGE_Aeromo_4_4572_NC_048773(1),PHAGE_Ralsto_RSL1_NC_010811(1),PHAGE_Stx2_c_Stx2a_WGPS9_NC_049923(1),…	5	0.2307	49.2
		9	10.2Kb	questionable(70)	transposase,tail,integrase	2910029-2920256	0	9	7	2	1	0	yes	4	PHAGE_Stx2_c_Stx2a_F451_NC_049924(4),PHAGE_Escher_SH2026Stx1_NC_049919(3),PHAGE_Stx2_c_1717_NC_011357(3),PHAGE_Entero_BP_4795_NC_004813(1),PHAGE_Salmon_SJ46_NC_031129(1),PHAGE_Stx2_c_Stx2a_WGPS9_NC_049923(1),PHAGE_Escher_ArgO145_NC_049918(1)	4	0.4444	47.4
		10	31.7Kb	intact(120)	integrase,transposase,tail	3274079-3305826	1	43	27	16	1	0	yes	15	PHAGE_Escher_500465_1_NC_049342(12),PHAGE_Entero_YYZ_2008_NC_011356(7),PHAGE_Entero_BP_4795_NC_004813(6),PHAGE_Stx2_c_1717_NC_011357(6),PHAGE_Escher_SH2026Stx1_NC_049919(4),PHAGE_Entero_VT2phi_272_NC_028656(3),PHAGE_Stx2_II_NC_004914(2),PHAGE_Shigel_Sf6_NC_005344(2),PHAGE_Entero_HK446_NC_019714(2),PHAGE_Stx2_c_Stx2a_F451_NC_049924(2),PHAGE_Stx2_c_86_NC_008464(2),PHAGE_Stx2_c_Stx2a_WGPS9_NC_049923…	10	0.279	44.4
		11	70.7Kb	intact(150)	injection,integrase,capsid,lysin,tail,terminase,head	3570734-3641530	0	89	86	3	1	0	yes	17	PHAGE_Escher_ArgO145_NC_049918(42),PHAGE_Stx2_c_Stx2a_F451_NC_049924(35),PHAGE_Escher_Lys12581Vzw_NC_049917(28),PHAGE_Entero_VT2phi_272_NC_028656(26),PHAGE_Entero_933W_NC_000924(24),PHAGE_Stx2_c_Stx2a_WGPS9_NC_049923(22),PHAGE_Escher_P13374_NC_018846(20),PHAGE_Escher_PA28_NC_041935(19),PHAGE_Escher_PA2_NC_028449(19),PHAGE_Stx2_vB_EcoP_24B_NC_027984(16),PHAGE_Entero_VT2_Sakai_NC_000902(15),PHAGE_E…	36	0.4719	49.5
		12	56.2Kb	intact(150)	integrase,tail,transposase,terminase,head,portal	3887148-3943349	0	78	71	7	1	0	yes	19	PHAGE_Entero_YYZ_2008_NC_011356(38),PHAGE_Entero_BP_4795_NC_004813(37),PHAGE_Stx2_c_1717_NC_011357(26),PHAGE_Entero_933W_NC_000924(15),PHAGE_Stx2_vB_EcoP_24B_NC_027984(12),PHAGE_Stx2_c_Stx2a_WGPS9_NC_049923(11),PHAGE_Escher_SH2026Stx1_NC_049919(11),PHAGE_Stx2_c_Stx2a_F451_NC_049924(11),PHAGE_Escher_phage_NC_004913(10),PHAGE_Entero_VT2_Sakai_NC_000902(9),PHAGE_Entero_cdtI_NC_009514(8),PHAGE_Escher…	40	0.4871	52.5
		13	6.8Kb	incomplete(10)	NA	4086899-4093743	0	10	6	4	1	0	no	5	PHAGE_Stx2_c_Stx2a_WGPS9_NC_049923(2),PHAGE_Pectob_CBB_NC_041878(2),PHAGE_Entero_BP_4795_NC_004813(2),PHAGE_Stx2_II_NC_004914(2),PHAGE_Escher_PA28_NC_041935(2),PHAGE_Erwini_vB_EamM_Asesino_NC_031107(1),PHAGE_Serrat_BF_NC_041917(1),PHAGE_Rhodot_RM378_NC_004735(1),PHAGE_Erwini_vB_EamM_Machina_NC_042056(1),PHAGE_Erwini_phiEaH2_NC_019929(1),PHAGE_Pseudo_MP1412_NC_018282(1),PHAGE_Pseudo_pf16_NC_041881…	2	0.2	51.9
		14	41.7Kb	intact(150)	tail,transposase,terminase,head,portal	4123602-4165317	0	55	45	10	1	0	yes	23	PHAGE_Entero_BP_4795_NC_004813(15),PHAGE_Entero_YYZ_2008_NC_011356(13),PHAGE_Stx2_c_1717_NC_011357(9),PHAGE_Entero_DE3_NC_042057(9),PHAGE_Entero_HK629_NC_019711(7),PHAGE_Entero_lambda_NC_001416(6),PHAGE_Entero_mEp460_NC_019716(6),PHAGE_Salmon_118970_sal3_NC_031940(5),PHAGE_Phage_Gifsy_1_NC_010392(5),PHAGE_Entero_HK630_NC_019723(5),PHAGE_Entero_N15_NC_001901(4),PHAGE_Entero_HK225_NC_019717(4),PHAG…	16	0.2727	51.9
		15	27Kb	intact(140)	transposase,tail,recombinase,integrase	4214188-4241250	0	34	30	4	1	0	yes	9	PHAGE_Entero_P88_NC_026014(18),PHAGE_Escher_520873_NC_049344(17),PHAGE_Escher_503458_NC_049341(10),PHAGE_Escher_500465_2_NC_049343(8),PHAGE_Entero_phiT5282H_NC_049429(6),PHAGE_Klebsi_3LV2017_NC_047817(3),PHAGE_Escher_PA28_NC_041935(3),PHAGE_Salmon_RE_2010_NC_019488(2),PHAGE_Haemop_HP2_NC_003315(2),PHAGE_Klebsi_ST15_OXA48phi14.1_NC_049454(1),PHAGE_Stx2_II_NC_004914(1),PHAGE_Sphing_PAU_NC_019521(1)…	19	0.5294	49.9
		16	64.6Kb	intact(150)	tail,portal,transposase,integrase,terminase,lysin	4586114-4650803	0	96	82	14	1	0	yes	33	PHAGE_Entero_HK629_NC_019711(15),PHAGE_Entero_HK630_NC_019723(15),PHAGE_Entero_DE3_NC_042057(15),PHAGE_Entero_lambda_NC_001416(15),PHAGE_Entero_YYZ_2008_NC_011356(13),PHAGE_Entero_BP_4795_NC_004813(12),PHAGE_Stx2_c_1717_NC_011357(9),PHAGE_Entero_mEp237_NC_019704(7),PHAGE_Stx2_c_Stx2a_F451_NC_049924(7),PHAGE_Entero_HK225_NC_019717(7),PHAGE_Entero_cdtI_NC_009514(6),PHAGE_Shigel_POCJ13_NC_025434(6),…	15	0.1562	51.2
		17	60Kb	intact(150)	tail,head,portal,terminase,lysin,integrase	4820608-4880698	0	68	60	8	1	0	yes	25	PHAGE_Entero_YYZ_2008_NC_011356(28),PHAGE_Entero_BP_4795_NC_004813(28),PHAGE_Stx2_c_1717_NC_011357(22),PHAGE_Phage_Gifsy_2_NC_010393(6),PHAGE_Shigel_POCJ13_NC_025434(6),PHAGE_Stx2_c_Stx2a_F451_NC_049924(5),PHAGE_Shigel_Stx_NC_029120(5),PHAGE_Entero_cdtI_NC_009514(5),PHAGE_Pseudo_PAJU2_NC_011373(4),PHAGE_Entero_mEp460_NC_019716(4),PHAGE_Phage_Gifsy_1_NC_010392(4),PHAGE_Entero_933W_NC_000924(4),PHA…	30	0.4117	50.3
		18	87.2Kb	intact(150)	transposase,tail,head,portal,terminase,integrase	4986491-5073739	0	95	77	18	1	0	yes	25	PHAGE_Entero_BP_4795_NC_004813(21),PHAGE_Entero_YYZ_2008_NC_011356(19),PHAGE_Stx2_c_1717_NC_011357(19),PHAGE_Entero_cdtI_NC_009514(15),PHAGE_Entero_mEp460_NC_019716(12),PHAGE_Entero_c_1_NC_019706(8),PHAGE_Entero_DE3_NC_042057(8),PHAGE_Entero_mEp213_NC_019720(8),PHAGE_Entero_lambda_NC_001416(7),PHAGE_Entero_HK630_NC_019723(7),PHAGE_Escher_SH2026Stx1_NC_049919(6),PHAGE_Escher_ArgO145_NC_049918(6),P…	25	0.221	50.7
		19	18.3Kb	incomplete(30)	tail,integrase	5055372-5073695	0	17	8	9	1	0	yes	7	PHAGE_Entero_UAB_Phi20_NC_031019(2),PHAGE_Escher_phiV10_NC_007804(2),PHAGE_Entero_ES18_NC_006949(2),PHAGE_Salmon_118970_sal3_NC_031940(2),PHAGE_Pectob_ZF40_NC_019522(2),PHAGE_Shigel_POCJ13_NC_025434(1),PHAGE_Escher_Lys12581Vzw_NC_049917(1),PHAGE_Escher_HK639_NC_016158(1),PHAGE_Entero_phi80_NC_021190(1),PHAGE_Entero_HK630_NC_019723(1),PHAGE_Escher_ArgO145_NC_049918(1),PHAGE_Escher_PA2_NC_028449(1)…	2	0.1176	50.7
		20	6.3Kb	incomplete(40)	tail,transposase	5162289-5168619	0	9	6	3	1	0	no	5	PHAGE_Entero_VT2phi_272_NC_028656(2),PHAGE_Stx2_II_NC_004914(2),PHAGE_Stx2_c_1717_NC_011357(1),PHAGE_Salmon_Fels_1_NC_010391(1),PHAGE_Bacill_vB_BhaS_171_NC_030904(1),PHAGE_Entero_BP_4795_NC_004813(1),PHAGE_Brevib_Jimmer1_NC_029104(1),PHAGE_Thermo_THSA_485A_NC_018264(1),PHAGE_Escher_PA28_NC_041935(1),PHAGE_Phage_Gifsy_1_NC_010392(1),PHAGE_Lactob_Lb_NC_047983(1),PHAGE_Brevib_Sundance_NC_028749(1),P…	2	0.2222	47.9
		21	50.3Kb	intact(110)	tail,lysin,integrase	5165314-5215696	0	45	42	3	1	0	yes	17	PHAGE_Entero_DE3_NC_042057(25),PHAGE_Entero_lambda_NC_001416(25),PHAGE_Entero_HK629_NC_019711(24),PHAGE_Entero_HK630_NC_019723(23),PHAGE_Entero_HK225_NC_019717(7),PHAGE_Entero_mEp237_NC_019704(7),PHAGE_Entero_BP_4795_NC_004813(6),PHAGE_Entero_phi80_NC_021190(5),PHAGE_Entero_mEp460_NC_019716(4),PHAGE_Entero_cdtI_NC_009514(4),PHAGE_Entero_N15_NC_001901(3),PHAGE_Entero_YYZ_2008_NC_011356(3),PHAGE_En…	25	0.5555	50.3
		22	34.1Kb	questionable(90)	terminase,head,portal,capsid,integrase	5209249-5243422	0	34	17	17	1	0	yes	16	PHAGE_Salmon_118970_sal3_NC_031940(4),PHAGE_Salmon_ST64B_NC_004313(3),PHAGE_Shigel_SfII_NC_021857(3),PHAGE_Psychr_Psymv2_NC_023734(2),PHAGE_Shigel_SfIV_NC_022749(2),PHAGE_Bacill_phi105_NC_048631(2),PHAGE_Faecal_FP_Epona_NC_047910(1),PHAGE_Entero_phiSHEF2_NC_042021(1),PHAGE_Stenot_S1_NC_011589(1),PHAGE_Bacill_phi105_NC_004167(1),PHAGE_Entero_EfaCPT1_NC_025465(1),PHAGE_Entero_IME_EF4_NC_023551(1),P…	2	0.1176	49.6
		23	53.9Kb	intact(150)	tail,head,portal,terminase,lysin,lysis,integrase	5249210-5303150	0	68	52	16	1	0	yes	25	PHAGE_Entero_BP_4795_NC_004813(24),PHAGE_Entero_YYZ_2008_NC_011356(22),PHAGE_Stx2_c_1717_NC_011357(17),PHAGE_Escher_Lys12581Vzw_NC_049917(6),PHAGE_Entero_mEp460_NC_019716(6),PHAGE_Entero_VT2_Sakai_NC_000902(5),PHAGE_Shigel_POCJ13_NC_025434(4),PHAGE_Escher_ArgO145_NC_049918(3),PHAGE_Salmon_118970_sal3_NC_031940(3),PHAGE_Shigel_Stx_NC_029120(3),PHAGE_Escher_phiV10_NC_007804(3),PHAGE_Stx2_c_Stx2a_F4…	23	0.3529	51.4
		24	10.7Kb	questionable(70)	transposase	5420145-5430876	0	14	9	5	1	0	no	3	PHAGE_Stx2_c_1717_NC_011357(3),PHAGE_Escher_SH2026Stx1_NC_049919(3),PHAGE_Stx2_c_Stx2a_F451_NC_049924(3),PHAGE_Acinet_vB_AbaM_ME3_NC_041884(2),PHAGE_Entero_BP_4795_NC_004813(1),PHAGE_Clostr_phiCD146_NC_028958(1),PHAGE_Clostr_phiCD111_NC_028905(1),PHAGE_Clostr_phiCD38_2_NC_015568(1)	6	0.2142	53.4
		25	29.2Kb	questionable(80)	transposase,integrase	5431684-5460965	0	16	9	7	1	0	yes	6	PHAGE_Stx2_c_1717_NC_011357(3),PHAGE_Escher_SH2026Stx1_NC_049919(3),PHAGE_Stx2_c_Stx2a_F451_NC_049924(3),PHAGE_Vibrio_SIO_2_NC_016567(1),PHAGE_Entero_P1_NC_005856(1),PHAGE_Stenot_S1_NC_011589(1),PHAGE_Pseudo_SM1_NC_041877(1),PHAGE_Klebsi_Sugarland_NC_042093(1),PHAGE_Burkho_KL3_NC_015266(1),PHAGE_Klebsi_vB_Kpn_IME260_NC_041899(1),PHAGE_Pseudo_MD8_NC_031091(1),PHAGE_Entero_BP_4795_NC_004813(1),PHAG…	3	0.1875	45
		26	57.9Kb	intact(130)	terminase,head,capsid,tail	5520520-5578461	0	77	72	5	1	0	no	14	PHAGE_Stx2_c_Stx2a_F451_NC_049924(36),PHAGE_Stx2_c_Stx2a_WGPS9_NC_049923(34),PHAGE_Stx2_II_NC_004914(34),PHAGE_Entero_933W_NC_000924(30),PHAGE_Entero_VT2_Sakai_NC_000902(29),PHAGE_Escher_ArgO145_NC_049918(24),PHAGE_Stx2_vB_EcoP_24B_NC_027984(20),PHAGE_Escher_phage_NC_004913(20),PHAGE_Escher_PA28_NC_041935(18),PHAGE_Escher_SH2026Stx1_NC_049919(11),PHAGE_Escher_Lys12581Vzw_NC_049917(10),PHAGE_Enter…	20	0.4675	50.2
	pO157	1	11.9Kb	incomplete(40)	transposase,tail,integrase	417-12329	0	10	6	4	1	0	yes	5	PHAGE_Escher_RCS47_NC_042128(2),PHAGE_Yersin_PY54_NC_005069(2),PHAGE_Entero_N15_NC_001901(2),PHAGE_Stx2_II_NC_004914(2),PHAGE_Entero_VT2phi_272_NC_028656(2),PHAGE_Klebsi_phiKO2_NC_005857(2),PHAGE_Entero_P1_NC_005856(1),PHAGE_Escher_PA28_NC_041935(1),PHAGE_Mycoba_Charlie_NC_023729(1),PHAGE_Bordet_BPP_1_NC_005357(1),PHAGE_Brevib_Sundance_NC_028749(1),PHAGE_Entero_BP_4795_NC_004813(1),PHAGE_Mycoba_S…	2	0.2	51.8
Criteria for scoring prophage regions (as intact, questionable, or incomplete):
Method 1:
1. If the number of certain phage organism in this table is more than or equal to 100% of the total number of CDS of the region,
the region is marked with total score 150. If less than 100%, method 2 and 3 will be used.
Method 2:
1. If the number of certain phage organism in this table is more than 50% of the total number of CDS of the region, that phage
organism is considered as the major potential phage for that region; the percentage of the total number
of that phage organism in this table in the total number of proteins of the region is calculated and
then multipled by 100; the percentage of the length of that phage organism in this table in the length
of the region is calculated and then multipled by 50 (phage head's encapsulation capability is considered).
Method 3:
1. If any of the specific phage-related keywords (such as 'capsid', 'head', 'integrase', 'plate', 'tail', 'fiber',
'coat', 'transposase', 'portal', 'terminase', 'protease' or 'lysin') are present, the score will be increased
by 10 for each keyword found.
2. If the size of the region is greater than 30 Kb, the score will be increased by 10.
3. If there are at least 40 proteins in the region, the score will be increased by 10.
4. If all of the phage-related proteins and hypothetical proteins constitute more than 70% of
the total number of proteins in the region, the score will be increased by 10.
Compared the total score of method 2 with the total score of method 3, the bigger one is chosen as the total score of the region.
If the region's total score is less than 70, it is marked as incomplete; if between 70 to 90, it is marked as questionable; if greater than 90, it is marked as intact.
